# Supplementary material for: Measurement of soft tissue drug concentrations in morbidly obese and non-obese patients – A prospective, parallel group, open-labeled, controlled, phase IV, single center clinical trial
Source: PubMed Central journal article supplement — Contemp Clin Trials Commun. 2019 May 10;15:100375. doi: 10.1016/j.conctc.2019.100375 (PMC6535681; doi:10.1016/j.conctc.2019.100375), 2019-05-10

## Ethik-Kommission an der Medizinischen Fakultät der Universität Leipzig

☒ Geschäftsstelle der Ethik-Kommission an der Medizinischen Fakultät der Universität Leipzig,  
Haus: Karl-Sudhoff-Institut für Geschichte der Medizin und der Naturwissenschaften,  
Käthe-Kollwitz-Str. 82, 04109 Leipzig

Vorsitzender: Professor Dr. R. Preiß

Universität Leipzig - Medizinische Fakultät  
IFB AdipositasErkrankungen  
„IFB Data Center“  
c/o ZKS Leipzig – KKS  
Frau Dr. Christiane Prettin  
Härtelstraße 16-18  
04107 Leipzig

Leipzig, den 10. November 2015

Bearb.: Nr. **121/13-ff**  
(Bitte stets angeben!)

cc: BfArM

|                                |                                                                                                                                                                                              |
|--------------------------------|----------------------------------------------------------------------------------------------------------------------------------------------------------------------------------------------|
| <b>EudraCT-Nr.:</b>            | <b>2012-004383-22</b>                                                                                                                                                                        |
| <b>Kurzwort/Studiencode:</b>   | <b>Mikrodialyse</b>                                                                                                                                                                          |
| <b>Titel:</b>                  | Perioperative Komplikationen bei adipösen und nicht adipösen Patienten: Vorbeugung und Behandlung von Wundinfektionen und postoperativen Schmerzen.                                          |
| <b>Principal investigator:</b> | Prof. Dr. Hermann Wrigge, Universitätsklinikum Leipzig AöR, Department für Operative Medizin, Klinik und Poliklinik für Anästhesiologie und Intensivtherapie, Liebigstraße 20, 04103 Leipzig |
| <b>Sponsor:</b>                | Universität Leipzig, Ritterstraße 26, 04109 Leipzig                                                                                                                                          |
| <b>Einreicher:</b>             | Zentrum für Klinische Studien Leipzig – KKS, Härtelstraße 16-18, 04107 Leipzig                                                                                                               |

Die Ethik-Kommission an der Medizinischen Fakultät der Universität Leipzig hat die im Schreiben vom 08.10.2015 eingereichten Unterlagen zur Kenntnis genommen und erhebt keine Einwände gegen diese.

Der Kommission lagen folgende Unterlagen vor:

- PIC/ICF Präparategruppe 3 Version 2.0 (02.09.2015)

Professor Dr. R. Preiß  
Vorsitzender der Ethik-Kommission

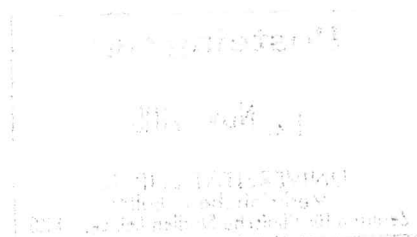

Supplement: mmc3.pdf [file mmc3.pdf]
