# Supplementary material for: Measurement of soft tissue drug concentrations in morbidly obese and non-obese patients – A prospective, parallel group, open-labeled, controlled, phase IV, single center clinical trial
Source: PubMed Central journal article supplement — Contemp Clin Trials Commun. 2019 May 10;15:100375. doi: 10.1016/j.conctc.2019.100375 (PMC6535681; doi:10.1016/j.conctc.2019.100375), 2019-05-10
Supplement: mmc1.pdf [file mmc1.pdf]

# Prüfplan

---

Perioperative Komplikationen bei adipösen und nicht adipösen Patienten: Vorbeugung und Behandlung von Wundinfektionen und postoperativen Schmerzen.

Prospektive, offene, monozentrische Studie zur Untersuchung von perioperativen Gewebskonzentrationen an Antibiotika und peripheren Analgetika mittels Mikrodialysetechnik bei adipösen und nicht adipösen Patienten.

## Kurztitel: Mikrodialyse

---

Eine Studie des Integrierten Forschungs- und Behandlungszentrums Adipositas Erkrankungen Leipzig  
Gefördert vom Bundesministerium für Bildung und Forschung

Projektkennung: ADI-K7 42

### Studienleitung

Prof. Dr. Hermann Wrigge  
Klinik und Poliklinik für Anästhesiologie und  
Intensivtherapie  
Universitätsklinikum Leipzig AöR  
Liebigstr. 20; 04103 Leipzig

### Biometrie / Koordination / Datenmanagement

Dr. David Petroff / Dr. Christiane Prettin /  
Berit Kalina  
Zentrum für Klinische Studien Leipzig - KKS  
Härtelstraße 16-18  
04107 Leipzig

### Sponsor:

Universität Leipzig, Ritterstr. 26, 04109 Leipzig

gesetzlicher Vertreter des Sponsors:

Prof. Dr. Hermann Wrigge

Datum der Fassung: 27.03.2013

Status der Fassung: Final 3.0

EudraCT-Nr.: 2012-004383-22

© Version Final 3.0 gültig ab 27.03.2013

Druck:

Schriftführung:

Erstellt auf der Grundlage der Prüfplanvorlage des  
Zentrums für Klinische Studien Leipzig - KKS.

# INHALTSVERZEICHNIS

|     |                                                                              |    |
|-----|------------------------------------------------------------------------------|----|
| 1   | Rationale und Fragestellung.....                                             | 13 |
| 1.1 | Hintergrund .....                                                            | 13 |
| 1.2 | Rationale.....                                                               | 13 |
| 1.3 | Nutzen-Risiko Abschätzung .....                                              | 15 |
| 2   | Studienziele .....                                                           | 17 |
| 2.1 | Primäre Ziele .....                                                          | 17 |
| 2.2 | Sekundäre Ziele.....                                                         | 17 |
| 3   | Studienbeschreibung.....                                                     | 17 |
| 3.1 | Studiendesign .....                                                          | 17 |
| 3.2 | Personelle und technische Anforderungen an das Prüfzentrum.....              | 17 |
| 3.3 | Zahl der Patienten .....                                                     | 18 |
| 3.4 | Erwartete Studiendauer.....                                                  | 18 |
| 3.5 | Studienabbruch.....                                                          | 18 |
| 4   | Studienpopulation .....                                                      | 19 |
| 4.1 | Einschlusskriterien (alle müssen erfüllt sein): .....                        | 19 |
| 4.2 | Ausschlusskriterien.....                                                     | 19 |
| 4.3 | Teilnahme an mehreren klinischen Prüfungen.....                              | 21 |
| 4.4 | Erklärung zur Einbeziehung abhängiger Personen.....                          | 21 |
| 4.5 | Begründung der Geschlechterverteilung .....                                  | 21 |
| 5   | Prüftherapie .....                                                           | 22 |
| 5.1 | Prüfpräparate.....                                                           | 22 |
| 5.2 | Verwaltung der Prüfpräparate / Drug Accountability .....                     | 26 |
| 5.3 | Hinweise zur Anwendung der Prüfpräparate.....                                | 26 |
| 6   | Individueller Studienablauf .....                                            | 34 |
| 6.1 | Patientenaufklärung und -einwilligung.....                                   | 34 |
| 6.2 | Aufnahme in die Studie .....                                                 | 34 |
| 6.3 | Beschreibung des Studienablaufes .....                                       | 35 |
| 6.4 | Vorzeitiger Abbruch der Studientherapie oder der Nachbeobachtung.....        | 37 |
| 6.5 | Plan zur Weiterbehandlung .....                                              | 38 |
| 7   | Unerwünschte Ereignisse (AE/SAE) .....                                       | 38 |
| 7.1 | Unerwünschtes Ereignis (AE).....                                             | 38 |
| 7.2 | Sicherheitsanalysen .....                                                    | 39 |
| 7.3 | Begleiterkrankungen.....                                                     | 39 |
| 7.4 | Schwerwiegendes unerwünschtes Ereignis (SAE) .....                           | 39 |
| 7.5 | Periodische Berichte.....                                                    | 41 |
| 7.6 | Verdacht unerwarteter schwerwiegender Arzneimittelnebenwirkung (SUSAR) ..... | 41 |
| 7.7 | Therapeutische Maßnahmen.....                                                | 42 |
| 7.8 | Umgang mit Schwangerschaften.....                                            | 42 |
| 8   | Biometrie.....                                                               | 42 |
| 8.1 | Biometrische Aspekte des Studiendesigns .....                                | 42 |
| 8.2 | Statistische Formulierung der Studienfrage .....                             | 43 |
| 8.3 | Fallzahldiskussion.....                                                      | 44 |

---

|      |                                                                          |    |
|------|--------------------------------------------------------------------------|----|
| 8.4  | Verfahren zur Datenanalyse.....                                          | 44 |
| 8.5  | Zwischenauswertungen.....                                                | 44 |
| 8.6  | Endauswertung.....                                                       | 44 |
| 9    | Ethische und regulatorische Vorgaben .....                               | 45 |
| 9.1  | GCP-Erklärung .....                                                      | 45 |
| 9.2  | Antragstellung.....                                                      | 45 |
| 9.3  | Nachträgliche Prüfplanänderungen .....                                   | 45 |
| 10   | Dokumentation .....                                                      | 46 |
| 10.1 | Prüfbögen (Case Report Forms - CRF).....                                 | 46 |
| 10.2 | Datenmanagement .....                                                    | 46 |
| 10.3 | Archivierung.....                                                        | 47 |
| 11   | Überwachung der klinischen Prüfung.....                                  | 47 |
| 11.1 | Zugang zu Quelldaten .....                                               | 47 |
| 11.2 | Monitoring .....                                                         | 48 |
| 11.3 | Audits .....                                                             | 48 |
| 11.4 | Inspektionen .....                                                       | 48 |
| 11.5 | Unabhängige Überwachung der Studie .....                                 | 48 |
| 12   | Datenschutz und Schweigepflicht .....                                    | 49 |
| 12.1 | Erklärung zum Datenschutz .....                                          | 49 |
| 12.2 | Erklärung zur pseudonymisierten Weitergabe personenbezogener Daten ..... | 49 |
| 13   | Administrative Regelungen.....                                           | 50 |
| 13.1 | Studiendurchführung nach Prüfplan .....                                  | 50 |
| 13.2 | Finanzierung und Versicherungen.....                                     | 50 |
| 13.3 | Lokale Überwachung .....                                                 | 50 |
| 13.4 | Publikationsvereinbarungen und Registrierung.....                        | 51 |
| 14   | Unterschriften zum Prüfplan .....                                        | 52 |
| 15   | Anerkennung des Prüfplans .....                                          | 52 |
| 16   | Anhang .....                                                             | 53 |
| 16.1 | Klassifikation unerwünschter Ereignisse .....                            | 53 |
| 16.2 | Abkürzungen.....                                                         | 55 |
| 16.3 | Literatur.....                                                           | 56 |

## ALLGEMEINE INFORMATIONEN

### Verantwortliche Personen

|                        |                                                                                                                                                                                                                                                                                                                                                                                                                                                                                                                         |
|------------------------|-------------------------------------------------------------------------------------------------------------------------------------------------------------------------------------------------------------------------------------------------------------------------------------------------------------------------------------------------------------------------------------------------------------------------------------------------------------------------------------------------------------------------|
| Sponsor<br>(gemäß AMG) | Universität Leipzig<br>Ritterstr. 26, 04109 Leipzig<br>Bevollmächtigter für die Vertretung des Sponsors nach außen:<br>Prof. Dr. Hermann Wrigge                                                                                                                                                                                                                                                                                                                                                                         |
| Studienleitung         | Prof. Dr. Hermann Wrigge<br>Klinik und Poliklinik für Anästhesiologie und Intensivtherapie<br>Universitätsklinikum Leipzig AöR<br>Liebigstr. 20<br>04103 Leipzig<br>Telefon: +49-341-97 17013<br>Fax: +49-341-97 17709                                                                                                                                                                                                                                                                                                  |
| Projektmanagement      | Dr. med. Philipp Simon<br>Klinik und Poliklinik für Anästhesiologie und Intensivtherapie<br>Universitätsklinikum Leipzig AöR<br>Liebigstr. 20<br>04103 Leipzig<br>Telefon: +49-341-97 17596<br>Fax: +49-341-97 17769<br><br>Dr. Christiane Prettin / Marizel Schwarzkopf<br>Zentrum für Klinische Studien Leipzig – KKS<br>Härtelstraße 16-18<br>04107 Leipzig<br>Tel.: +49-341-97 16254<br>Fax: +49-341-97 16189<br><a href="mailto:marizel.schwarzkopf@zks.uni-leipzig.de">marizel.schwarzkopf@zks.uni-leipzig.de</a> |
| Arzneimittelsicherheit | Madlen Dörschmann<br>Zentrum für Klinische Studien Leipzig – KKS<br>Härtelstraße 16-18<br>04107 Leipzig<br>Telefon: +49-341-97 16 129<br>Fax: +49-341-97 16 278<br><a href="mailto:Pharmacovigilance@zks.uni-leipzig.de">Pharmacovigilance@zks.uni-leipzig.de</a>                                                                                                                                                                                                                                                       |
| Datenmanagement        | Berit Kalina, Marc Viehweg<br>Zentrum für Klinische Studien Leipzig – KKS<br>Härtelstraße 16-18<br>04107 Leipzig<br>Telefon: +49-341-97 16 275 / 292<br>Fax: +49-341-97 16 259<br><a href="mailto:dm_adipo@zks.uni-leipzig.de">dm_adipo@zks.uni-leipzig.de</a>                                                                                                                                                                                                                                                          |
| Biometrie              | Dr. David Petroff<br>Zentrum für Klinische Studien Leipzig – KKS<br>Härtelstraße 16-18<br>04107 Leipzig<br>Telefon: +49-341-97 16 354                                                                                                                                                                                                                                                                                                                                                                                   |

|                                                             |                                                                                                                                                                                                                                                                                                                                                                                                                                                                                                                                                                                                                                                                               |
|-------------------------------------------------------------|-------------------------------------------------------------------------------------------------------------------------------------------------------------------------------------------------------------------------------------------------------------------------------------------------------------------------------------------------------------------------------------------------------------------------------------------------------------------------------------------------------------------------------------------------------------------------------------------------------------------------------------------------------------------------------|
|                                                             | <p>Fax: +49-341-97 16 189<br/> <a href="mailto:david.petroff@zks.uni-leipzig.de">david.petroff@zks.uni-leipzig.de</a></p>                                                                                                                                                                                                                                                                                                                                                                                                                                                                                                                                                     |
| Monitoring                                                  | <p>Nicole Köppe-Bauernfeind<br/> Zentrum für Klinische Studien Leipzig – KKS<br/> Härtelstraße 16-18<br/> 04107 Leipzig<br/> Telefon: +49-341-97 16 266<br/> Fax: +49-341-97 16 189</p>                                                                                                                                                                                                                                                                                                                                                                                                                                                                                       |
| Referenzlabor Analytik<br>Mikrodialysate, Plasma und Gewebe | <p>Prof. Dr. Frieder Kees<br/> Universität Regensburg<br/> Fakultät für Chemie und Pharmazie<br/> Institut für Pharmazie, Lehrstuhl für Pharmakologie und Toxikologie<br/> Universitätsstr. 31<br/> 93053 Regensburg</p> <p>Telefon: +49 941 943-4778<br/> Fax: +49 941 943-4772</p>                                                                                                                                                                                                                                                                                                                                                                                          |
| Förderer                                                    | <p>Integriertes Forschungs- und Behandlungszentrum<br/> Adipositas Erkrankungen<br/> Bundesministerium für Bildung und Forschung (BMBF)<br/> Förderkennzeichen: K7-42</p>                                                                                                                                                                                                                                                                                                                                                                                                                                                                                                     |
| Data Monitoring Committee                                   | <p>Dr. Med. Michael Adamzik<br/> Universitätsklinikum Essen<br/> Klinik für Anästhesiologie und Intensivmedizin<br/> Hufelandstr. 55, 45122 Essen<br/> Telefon: +49-201-723 1480<br/> Fax: +49-201-723 5758</p> <p>Prof. Alexander Schachtrupp<br/> B. Braun Melsungen AG<br/> Carl-Braun-Str. 1, 34212 Melsungen<br/> Telefon: +49-5661-71 0<br/> Fax: +49-5661-71 4567</p> <p>Prof. Dr. Thomas Bein<br/> Universitätsklinikum Regensburg<br/> Klinik und Poliklinik für Chirurgie<br/> Franz-Josef-Strauss-Allee 11, 93053 Regensburg<br/> Telefon: +49-941-944-7926<br/> Fax: +49-941-944-6802<br/> E-Mail: <a href="mailto:thomas.bein@ukr.de">thomas.bein@ukr.de</a></p> |

## Prüfplan-Synopse

|                             |                                                                                                                                                                                                                                                                                                                                                                                                                                                                                                                                                                                                                                                                                                                                                                                                                                                                                                                                                                                                                                                                                                                                                                                                                                                                                                                                                                                                                                                                                                                                                                                                        |
|-----------------------------|--------------------------------------------------------------------------------------------------------------------------------------------------------------------------------------------------------------------------------------------------------------------------------------------------------------------------------------------------------------------------------------------------------------------------------------------------------------------------------------------------------------------------------------------------------------------------------------------------------------------------------------------------------------------------------------------------------------------------------------------------------------------------------------------------------------------------------------------------------------------------------------------------------------------------------------------------------------------------------------------------------------------------------------------------------------------------------------------------------------------------------------------------------------------------------------------------------------------------------------------------------------------------------------------------------------------------------------------------------------------------------------------------------------------------------------------------------------------------------------------------------------------------------------------------------------------------------------------------------|
| Titel der Studie:           | <p>Perioperative Komplikationen bei adipösen und nicht adipösen Patienten: Vorbeugung und Behandlung von Wundinfektionen und postoperativen Schmerzen.</p> <p>Prospektive, offene, monozentrische Studie zur Untersuchung von perioperativen Gewebskonzentrationen an Antibiotika und peripheren Analgetika mittels Mikrodialysetechnik bei adipösen und nicht adipösen Patienten</p>                                                                                                                                                                                                                                                                                                                                                                                                                                                                                                                                                                                                                                                                                                                                                                                                                                                                                                                                                                                                                                                                                                                                                                                                                  |
| Kurzbezeichnung der Studie: | Mikrodialyse                                                                                                                                                                                                                                                                                                                                                                                                                                                                                                                                                                                                                                                                                                                                                                                                                                                                                                                                                                                                                                                                                                                                                                                                                                                                                                                                                                                                                                                                                                                                                                                           |
| Indikation:                 | Elektiver chirurgischer Eingriff bei adipösen Patienten                                                                                                                                                                                                                                                                                                                                                                                                                                                                                                                                                                                                                                                                                                                                                                                                                                                                                                                                                                                                                                                                                                                                                                                                                                                                                                                                                                                                                                                                                                                                                |
| Primäre Ziele der Studie:   | Die Erstellung eines optimierten Medikamenten-Dosis Modells durch die Untersuchung von Gewebskonzentrationen an Antibiotika und Analgetika bei adipösen und nicht adipösen Patienten                                                                                                                                                                                                                                                                                                                                                                                                                                                                                                                                                                                                                                                                                                                                                                                                                                                                                                                                                                                                                                                                                                                                                                                                                                                                                                                                                                                                                   |
| Sekundäre Ziele der Studie: | Untersuchungen zu Wundinfektionen und Verbesserung der postoperativen Analgesie bei adipösen und nicht adipösen Patienten mit Hilfe des optimierten Medikamenten-Dosis-Modells                                                                                                                                                                                                                                                                                                                                                                                                                                                                                                                                                                                                                                                                                                                                                                                                                                                                                                                                                                                                                                                                                                                                                                                                                                                                                                                                                                                                                         |
| Studiendesign:              | Prospektive, offene, monozentrische Pilotstudie                                                                                                                                                                                                                                                                                                                                                                                                                                                                                                                                                                                                                                                                                                                                                                                                                                                                                                                                                                                                                                                                                                                                                                                                                                                                                                                                                                                                                                                                                                                                                        |
| Studienpopulation:          | <p><u>Einschlusskriterien – Indexgruppe:</u></p> <ul style="list-style-type: none"> <li>• Adipositas (<math>\text{BMI} \geq 35 \text{ kg/m}^2</math>)</li> <li>• Alter <math>\geq 18</math> Jahre</li> <li>• Patienten, die einem abdominalchirurgischen Eingriff unterzogen werden und bei denen die Notwendigkeit einer perioperativen antibiotischen Prophylaxe und Analgesie besteht</li> <li>• schriftliche Einwilligungserklärung durch Patienten</li> </ul> <p><u>Einschlusskriterien - Kontrollgruppe:</u></p> <ul style="list-style-type: none"> <li>• <math>\text{BMI} \geq 18,5</math> und <math>\text{BMI} &lt; 30 \text{ kg/m}^2</math></li> <li>• Alter <math>\geq 18</math> Jahre</li> <li>• Patienten, die einem abdominalchirurgischen Eingriff unterzogen werden und bei denen die Notwendigkeit einer perioperativen antibiotischen Prophylaxe und Analgesie besteht</li> <li>• schriftliche Einwilligungserklärung durch Patienten</li> </ul> <p><u>Ausschlusskriterien:</u></p> <p><u>Präparategruppe 1</u> (Linezolid, Meropenem und Paracetamol/ Metamizol):</p> <ul style="list-style-type: none"> <li>• Patienten, die in den 72 Stunden vor dem operativen Eingriff eine Therapie mit der Studienmedikation erhalten haben</li> <li>• Bekannte allergische Reaktion, <b>Überempfindlichkeit</b> bzw. Kontraindikation gegenüber <b>Propacetamol-HCl</b> bzw. <b>Metamizol-Natrium</b>, Carbapenem-Antibiotika, <math>\beta</math>-Laktam-Antibiotika (z. B. Penicilline, Cephalosporine), Pyrazolone und Pyrazolidine</li> <li>• <b>Schwere Leberinsuffizienz</b></li> </ul> |

|  |                                                                                                                                                                                                                                                                                                                                                                                                                                                                                                                                                                                                                                                                                                                                                                                                                                                                                                                                                                                                                                                                                                                                                                                                                                                                                                                                                                                                                                                                                                                                                                                                                                                                                                                                                                                                                                                                                                                                                                                                                                                                                                                                                                                                                                                                                                                                                                                                                                                                                                                                                                                                                                                                                                                                |
|--|--------------------------------------------------------------------------------------------------------------------------------------------------------------------------------------------------------------------------------------------------------------------------------------------------------------------------------------------------------------------------------------------------------------------------------------------------------------------------------------------------------------------------------------------------------------------------------------------------------------------------------------------------------------------------------------------------------------------------------------------------------------------------------------------------------------------------------------------------------------------------------------------------------------------------------------------------------------------------------------------------------------------------------------------------------------------------------------------------------------------------------------------------------------------------------------------------------------------------------------------------------------------------------------------------------------------------------------------------------------------------------------------------------------------------------------------------------------------------------------------------------------------------------------------------------------------------------------------------------------------------------------------------------------------------------------------------------------------------------------------------------------------------------------------------------------------------------------------------------------------------------------------------------------------------------------------------------------------------------------------------------------------------------------------------------------------------------------------------------------------------------------------------------------------------------------------------------------------------------------------------------------------------------------------------------------------------------------------------------------------------------------------------------------------------------------------------------------------------------------------------------------------------------------------------------------------------------------------------------------------------------------------------------------------------------------------------------------------------------|
|  | <ul style="list-style-type: none"> <li>• bei Störungen der Knochenmarkfunktion (z. B. nach Zytostatikabehandlung) oder Erkrankungen des hämatopoetischen Systems</li> <li>• genetisch bedingter Glukose-6-Phosphat-Dehydrogenase-Mangel,</li> <li>• akute hepatische Porphyrrie,</li> <li>• bestehende Hypotonie</li> <li>• Patienten mit Phenylketonurie, hereditärer Fructose-Intoleranz</li> <li>• innerhalb der letzten zwei Wochen Einnahme von Medikamenten, die die Monoaminoxidase A oder B (z. B. Phenelzin, Isocarboxazid, Selegilin, Moclobemid) hemmen</li> <li>• Frauen während der Schwangerschaft und Stillzeit (positiver Schwangerschaftstest bei Frauen im gebärfähigen Alter)</li> <li>• Teilnahme an anderen interventionellen Therapiestudien nach AMG</li> </ul> <p><u>Präparatengruppe 2 (Tigecyclin und Paracetamol/ Metamizol):</u></p> <ul style="list-style-type: none"> <li>• Patienten, die in den 72 Stunden vor dem operativen Eingriff eine Therapie mit der Studienmedikation erhalten haben</li> <li>• Bekannte allergische Reaktion, <b>Überempfindlichkeit</b> bzw. Kontraindikation gegenüber <b>Propacetamol-HCl</b> bzw. <b>Metamizol-Natrium</b></li> <li>• Schwere Leberinsuffizienz</li> <li>• Störungen der Knochenmarkfunktion, Erkrankungen des hämatopoetischen Systems, Genetisch bedingter Glucose-6-Phosphat-Dehydrogenase-Mangel (Hämolysegefahr), Akute hepatische Porphyrrie</li> <li>• genetisch bedingter Glukose-6-Phosphat-Dehydrogenase-Mangel,</li> <li>• akute hepatische Porphyrrie,</li> <li>• bestehende Hypotonie</li> <li>• eingeschränkte Nierenfunktion (Kreatinin-Clearance &lt; 35 ml/min)</li> <li>• Frauen während der Schwangerschaft und Stillzeit (positiver Schwangerschaftstest bei Frauen im gebärfähigen Alter)</li> <li>• Teilnahme an anderen interventionellen Therapiestudien nach AMG</li> </ul> <p><u>Präparatengruppe 3 (Cefazolin, Metronidazol und Paracetamol/ Metamizol):</u></p> <ul style="list-style-type: none"> <li>• Patienten, die in den 72 Stunden vor dem operativen Eingriff eine Therapie mit der Studienmedikation erhalten haben</li> <li>• Bekannte allergische Reaktion, <b>Überempfindlichkeit</b> bzw. Kontraindikation gegenüber <b>Propacetamol-HCl</b> bzw. <b>Metamizol-Natrium</b>, Cephalosporine, andere Cephalosporine, 5-Nitroimidazole</li> <li>• Schwere Leberinsuffizienz</li> <li>• Störungen der Knochenmarkfunktion, Erkrankungen des hämatopoetischen Systems, genetisch bedingter Glucose-6-Phosphat-Dehydrogenase-Mangel (Hämolysegefahr),</li> <li>• Akute hepatische Porphyrrie</li> <li>• bestehende Hypotonie</li> <li>• eingeschränkte Nierenfunktion (Kreatinin-Clearance &lt; 35</li> </ul> |
|--|--------------------------------------------------------------------------------------------------------------------------------------------------------------------------------------------------------------------------------------------------------------------------------------------------------------------------------------------------------------------------------------------------------------------------------------------------------------------------------------------------------------------------------------------------------------------------------------------------------------------------------------------------------------------------------------------------------------------------------------------------------------------------------------------------------------------------------------------------------------------------------------------------------------------------------------------------------------------------------------------------------------------------------------------------------------------------------------------------------------------------------------------------------------------------------------------------------------------------------------------------------------------------------------------------------------------------------------------------------------------------------------------------------------------------------------------------------------------------------------------------------------------------------------------------------------------------------------------------------------------------------------------------------------------------------------------------------------------------------------------------------------------------------------------------------------------------------------------------------------------------------------------------------------------------------------------------------------------------------------------------------------------------------------------------------------------------------------------------------------------------------------------------------------------------------------------------------------------------------------------------------------------------------------------------------------------------------------------------------------------------------------------------------------------------------------------------------------------------------------------------------------------------------------------------------------------------------------------------------------------------------------------------------------------------------------------------------------------------------|

|                      |                                                                                                                                                                                                                                                                                                                                                                                                                                                                                                                                                                                                                                                                                                                                                             |
|----------------------|-------------------------------------------------------------------------------------------------------------------------------------------------------------------------------------------------------------------------------------------------------------------------------------------------------------------------------------------------------------------------------------------------------------------------------------------------------------------------------------------------------------------------------------------------------------------------------------------------------------------------------------------------------------------------------------------------------------------------------------------------------------|
|                      | <p>ml/min)</p> <ul style="list-style-type: none"> <li>Frauen während der Schwangerschaft und Stillzeit (positiver Schwangerschaftstest bei Frauen im gebärfähigen Alter)</li> <li>Teilnahme an anderen interventionellen Therapiestudien nach AMG</li> </ul>                                                                                                                                                                                                                                                                                                                                                                                                                                                                                                |
| Patientenzahl:       | N = 90 – 30 pro Präparategruppe (jeweils 15 Adipöse und 15 Kontrollen)                                                                                                                                                                                                                                                                                                                                                                                                                                                                                                                                                                                                                                                                                      |
| Studienintervention: | <p>Intervention:</p> <p>Perioperative Gewinnung von interstitieller Flüssigkeit mithilfe Mikrodialysekatheter im Rahmen einer routinemäßigen perioperativen antibiotischen Prophylaxe und Analgesie zur Untersuchung der Pharmakokinetik verschiedener Antibiotika, peripherer Analgetika und weiteren Zielsubstanzen in der interstitiellen Flüssigkeit.</p> <p>Bestimmung der Medikamentenkonzentrationen im während des chirurgischen Eingriffs entnommenen Fettgewebe.</p> <p>Kontrolle:</p> <p>Kontrollgruppe der nicht adipösen Patienten (abgestimmt nach Alter, Geschlecht und Art des chirurgischen Eingriffes).</p> <p>Sicherheit:</p> <p>standardmäßige Überwachung von Vitalparametern während der Narkose. Überwachung von Nebenwirkungen.</p> |
| Primärer Endpunkt:   | Die Fläche unter der Konzentrations-Zeit-Kurve ( $AUC_{0-8}$ ) der untersuchten Medikamente in der interstitiellen Flüssigkeit und im Plasma                                                                                                                                                                                                                                                                                                                                                                                                                                                                                                                                                                                                                |
| Sekundäre Endpunkte: | <p>Pharmakokinetische Parameter: Die Fläche unter der Konzentrations-Zeit-Kurve (AUC), maximale Konzentrationen (<math>C_{max}</math>), <math>C_{max}/MIC</math> (<math>MIC</math> = minimal inhibitory concentration), <math>AUC/MIC</math> in der interstitiellen Flüssigkeit und im Plasma nach Medikamentenapplikation, time over MIC (<math>T &gt; MIC</math>), <math>AUC_{tissue}/AUC_{plasma}</math> Verhältnis, PK/PD-Parameter, Halbwertszeiten (<math>t_{1/2}</math>);</p> <p>Konzentrationen der Zielsubstanzen im chirurgisch entnommenen Gewebe;</p> <p>Die Inzidenz von Wundinfektionen und postoperatives Schmerzscoring</p>                                                                                                                 |
| Biometrie:           | <p>Für den primären Endpunkt wird das Konfidenzintervall für den Korrelationskoeffizient mit Fishers Z-Transformation ausgerechnet. Andere Endpunkte werden mit (multiplen) Regressionsanaylsen untersucht und die Rate der Wundinfektionen mit dem exakten Fisher-Test.</p> <p>Abgeleitete Größen aus der Mikrodialyse wie z.B. die maximale Konzentration <math>C_{max}</math> oder die Halbwertszeit <math>t_{1/2}</math> können vergleichsweise durch ein Bayessches hierarchisches Modell ermittelt werden unter der Annahme, dass die Konzentration im</p>                                                                                                                                                                                            |

|           |                                                                                                                                                                                                                                                                                                                                                                                                                                                                                |
|-----------|--------------------------------------------------------------------------------------------------------------------------------------------------------------------------------------------------------------------------------------------------------------------------------------------------------------------------------------------------------------------------------------------------------------------------------------------------------------------------------|
|           | Laufe der Zeit exponentiell abfällt nach Erreichen des Maximums.                                                                                                                                                                                                                                                                                                                                                                                                               |
| Zeitplan: | <p>Dauer der Intervention pro Patient:<br/>8 Stunden ab der Applikation der Medikamente entsprechend der Präparategruppe.</p> <p>Beobachtungszeitraum:<br/>Ab dem Tag des chirurgischen Eingriffes bis zum 7. postoperativen Tag; bei Entlassung aus der Klinik vor dem 7. postoperativen Tag bis zur Entlassung aus der Klinik.</p> <p>Dauer (studienbezogen):<br/>Nach 36 Monaten: Abschluss des Patienteneinschlusses.<br/>Nach 42 Monaten: Abschluss der Auswertungen.</p> |

**Visitenplan:**

| <b>Untersuchung / Abfrage</b>                                                                       | <b>Visite 1</b><br>(Baseline) | <b>Visite 2 *</b><br>(Tag der Operation)  | <b>Visite 3 - 9</b><br>(Tag 1 – 7 postoperativ) |
|-----------------------------------------------------------------------------------------------------|-------------------------------|-------------------------------------------|-------------------------------------------------|
|                                                                                                     | Prämedikationsambulanz        | Normalstation, OP, ITS, PACU, Aufwachraum | ITS, PACU, Normalstation                        |
| Schriftliche Einwilligung                                                                           | x                             |                                           |                                                 |
| Demografie                                                                                          | x                             |                                           |                                                 |
| Anamnese, Begleiterkrankungen                                                                       | x                             |                                           |                                                 |
| Begleitmedikation                                                                                   | x                             |                                           | x                                               |
| Labor (Blutbild, klin. Chemie)                                                                      | x                             |                                           |                                                 |
| Einschlusskriterien/Ausschlusskriterien                                                             | x                             |                                           |                                                 |
| Unerwünschte Ereignisse / Nebenwirkungen                                                            |                               | x                                         | x **                                            |
| Platzierung von zwei Mikrodialysesonden und Äquilibration                                           |                               | x                                         |                                                 |
| in-vivo Kalibrierung der Mikrodialysesonden                                                         |                               | x                                         |                                                 |
| Medikamentenapplikation                                                                             |                               | x                                         |                                                 |
| Plasma für pharmakokinetische Untersuchungen nach dem unten aufgeführten Probenentnahmeplan         |                               | x                                         |                                                 |
| Microdialysate für pharmakokinetische Untersuchungen nach dem unten aufgeführten Probenentnahmeplan |                               | x                                         |                                                 |
| Entnahme vom Fettgewebe während des chirurgischen Eingriffs                                         |                               | x                                         |                                                 |
| Entfernung der Mikrodialysesonden 8 Stunden nach Medikamentenapplikation                            |                               | x                                         |                                                 |
| Bewertung der postoperativen Schmerzen                                                              |                               |                                           | x                                               |
| Wundinfektionen innerhalb der 1. Woche nach dem chirurgischen Eingriff                              |                               |                                           | x                                               |

\* Die Visite 2 umfasst die Einleitung der Operation, die operative Maßnahme, die Ausleitung der Allgemeinanästhesie sowie ITS, PACU und Aufwachraum am OP-Tag

\*\* Die Erfassung der SAE erfolgt bis 72 Stunden nach Applikation der Prüfpräparate (Visite 3- 5)

**Probenentnahmeplan:****(Visite 2, Tag der Operation)**

|        | Zeit                                            |                         | Zeit         |                     |
|--------|-------------------------------------------------|-------------------------|--------------|---------------------|
| Plasma | - 1 h - 0                                       |                         | -1 h - 0     | Äquilibration       |
|        | -                                               | Medikamentenapplikation | 0 - 30 min   | Mikrodialysate      |
|        | 30 min (direkt nach<br>Medikamentenapplikation) |                         | 30 - 60 min  |                     |
|        | 1 h                                             |                         | 60 - 90 min  |                     |
|        | -                                               |                         | 90 - 120 min |                     |
|        | 2 h                                             |                         | 2 - 3 h      |                     |
|        | 3 h                                             |                         | 3 - 4 h      |                     |
|        | 4 h                                             |                         | 4 - 5 h      |                     |
|        | 5 h                                             |                         | 5 - 6 h      |                     |
|        | 6 h                                             |                         | 6 - 7 h      |                     |
|        | 8 h                                             |                         | 7 - 8 h      |                     |
|        |                                                 |                         | 0 - 30 min   | Retro-<br>dialysate |
|        |                                                 |                         | 30 - 60 min  |                     |

# 1 RATIONALE UND FRAGESTELLUNG

## 1.1 Hintergrund

Die häufigsten Ursachen von Morbidität und Mortalität bei krankhaft adipösen Patienten, die sich bariatrischen oder anderen größeren chirurgischen Eingriffen unterziehen, sind pulmonale Komplikationen und Wundinfektionen (1, 4, 12, 13, 14, 15, 17, 24). Während die pulmonalen Komplikationen den Schwerpunkt eines anderen Projektes (IFB K7-21N) bilden, zielt diese Studie auf die Optimierung der Prävention und der Behandlung von Wundinfektionen sowie der perioperativen Analgesie.

Die antibiotische Prophylaxe verringert wirksam die Rate an postoperativen Wundinfektionen. Die perioperative Antibiotikaprophylaxe ist eine kurzzeitige, im Allgemeinen einmalige Gabe eines Antibiotikums vor einem operativen Eingriff. Ihr Ziel ist es, unabhängig von der Art des operativen Eingriffs primär die Anzahl postoperativer Wundinfektionen zu reduzieren. Durch die perioperative Antibiotikaprophylaxe soll eine Vermehrung von Erregern, die das Operationsfeld kontaminieren, vermieden werden (19, 27).

Die Standarddosierungsschemata für die perioperative Antibiotikaprophylaxe wurden in der Regel an gesunden nicht adipösen Probanden erarbeitet und beinhalten eine Einzeldosis von Antibiotikum ca. 1 Stunde vor dem chirurgischen Schnitt (19). Für Patienten mit Adipositas fehlen dagegen Daten zur Pharmakokinetik und den Gewebespiegeln der antibiotischen Prophylaxe und Therapie. Das Gleiche gilt auch für die peripheren Analgetika. Zur Therapieoptimierung ist die Kenntnis der pharmakokinetischen Eigenschaften der verwendeten Antibiotika am Wirkungsort unerlässlich. Mit Hilfe der Mikrodialyse ist es nunmehr möglich, den Konzentrationsverlauf der Antibiotika im Gewebe zu messen und somit die Daten zur Pharmakokinetik der Antibiotika und Analgetika bei adipösen Patienten zu erheben (1, 7, 24, 25, 2b).

Wir werden die Hypothese prüfen, dass unter den Standarddosierungsschemata bei krankhaft adipösen Patienten keine adäquaten Konzentrationen von Zielsubstanzen im subkutanen Bindegewebe erreicht werden. Demzufolge werden wir die Konzentrationen der verschiedenen Antibiotika und Analgetika in der interstitiellen Flüssigkeit der Subkutis und in Weichteilen des Operationsgebietes ermitteln, um ein optimiertes Medikament-Dosis-Modell erstellen zu können (1, 16, 25).

Diese prospektive, offene, monozentrische Studie schließt adipöse und Kontrollpatienten, die eine präoperative antibiotische Prophylaxe bedürfen, ein. Es werden Proben genommen aus dem arteriellen Blut, aus der interstitiellen Flüssigkeit mithilfe der Mikrodialyse und aus dem Fettgewebe, welches unmittelbar während des operativen Eingriffes entnommen wird. Der Probenentnahmeplan beinhaltet Messungen vor der antibiotischen Therapie, während und nach dem chirurgischen Eingriff für bis zu 8 Stunden nach der Medikamentenapplikation. Die Medikamentenkonzentrationen werden mit Hilfe der HPL-Chromatographie gemessen und nach standardisierten, pharmakokinetischen Berechnungen analysiert (4b, 5b, 6b).

## 1.2 Rationale

### 1.2.1 Hypothese und experimentelle Aspekte der klinischen Prüfung

Folgende Hypothesen und Ziele werden untersucht:

- Die Standarddosierungsschemata für antibiotische Prophylaxe und Therapie sowie für Therapie mit peripheren Analgetika sind für adipöse Patienten nicht geeignet.

- Die Erstellung eines optimierten Medikamenten-Dosis Modells durch die Untersuchung von Gewebskonzentrationen an Antibiotika und Analgetika bei adipösen und nicht adipösen Patienten.
- Erhebung von Pilotdaten hinsichtlich Senkung der Rate an Wundinfektionen und Verbesserung der postoperativen Analgesie bei adipösen Patienten mit Hilfe des optimierten Medikamenten-Dosis-Modells.

Zur Prüfung der o.g. Hypothesen ist die Kenntnis der pharmakokinetischen Eigenschaften der verwendeten Antibiotika und Analgetika am Wirkungsort unerlässlich. Mit Hilfe der Mikrodialyse ist es nunmehr möglich, den Konzentrationsverlauf der zu untersuchenden Substanzen im Gewebe zu messen [1b,2b,4b,6b,11b]. Die Mikrodialyse ermöglicht die Charakterisierung von interstitieller Flüssigkeit beim Menschen und basiert auf Probeentnahmen aus dem interstitiellen Raum durch eine semi-permeable Membran an der Spitze der Mikrodialyse-Sonde. Die Sonde wird kontinuierlich mit einer physiologischen Lösung bei geringen Flussgeschwindigkeiten (2µl/min) perfundiert. Nach Anbringen der Sonde im Gewebe werden Substanzen, die sich in der extrazellulären Flüssigkeit befinden in einer bestimmten Konzentration ( $C_{\text{Gewebe}}$ ) durch Diffusion aus dem Extrazellulärraum in die Sonde gefiltert und es stellt sich eine bestimmte Konzentration an Substanzen ( $C_{\text{Dialysat}}$ ) in der Perfusionsflüssigkeit ein. Die Proben werden gesammelt und analysiert. Ein Gleichgewicht zwischen Perfusionsflüssigkeit und Gewebe kann aufgrund des kontinuierlichen Flusses der Perfusionsflüssigkeit nicht erzielt werden. Die Konzentrationen in der Perfusionsflüssigkeit sind jedoch proportional zu den Konzentrationen im Gewebe. Für eine quantitative Analyse muss die Sonde daher vor dem Gebrauch kalibriert werden. Zur Bestimmung der relativen „Recovery“ erfolgt eine in-vivo Kalibrierung [2b,6b].

Für diese Studie werden Patienten rekrutiert, bei denen ein abdominalchirurgischer Eingriff in Allgemeinanästhesie geplant ist und eine Indikation zur perioperativen antibiotischen Prophylaxe besteht [19].

Die Patienten erhalten eine Standarddosis unterschiedlicher Analgetika und Antibiotika im Rahmen einer perioperativen Schmerztherapie sowie als perioperative Prophylaxe der chirurgischen Wundinfektion. Die verwendeten Substanzen kommen regelmäßig studienunabhängig im Rahmen einer Allgemeinanästhesie zum Einsatz. Die Präparate werden entsprechend der Zuteilung der Patienten in eine der drei Präparategruppen vorgegeben um reproduzierbare und valide Parameter erheben zu können und die Untersuchungsergebnisse vergleichbar zu machen. Die Wahl der antibiotisch wirksamen Substanzen erfolgte auf Grundlage der aktuellen Empfehlungen zur Antibiotikaprophylaxe für Risikoreduzierung von Weichteilinfektionen sowie klinischen Praxis [19,20]. Es wurden dabei Wirkspektren der einzelner Substanzen berücksichtigt um maximale Wirkung zur Prophylaxe der Weichteilinfektionen zu erzielen. Einige der vorgegebenen Substanzen, wie Tigecyclin, Linezolid und Meropenem sind auch gegen multiresistente Erreger wirksam. Die Daten zur Pharmakokinetik dieser Substanzen sind bei deutlich gestiegenen Raten an postoperativen Wundinfektionen durch multiresistente Erreger daher besonders interessant [20].

Die Mikrodialyse ermöglicht die Messung der freien Wirkstoffkonzentrationen unterschiedlicher Medikamente im Gewebe, dem Zielort der jeweiligen Arzneimittel. Deshalb sind die erhaltenen Wirkstoffprofile aussagekräftiger als traditionelle Quantifizierung von Medikamenten im Plasma (8b, 12b, 13b, 14b).

Es liegen aktuell Daten zur pharmakokinetischen Untersuchungen mithilfe der Mikrodialyse für unterschiedliche Antiinfektivagruppen vor. Die Mehrheit dieser Studien wurden an kleinen Kollektiven von < 10 Probanden/Gruppe durchgeführt. Für Gruppen Cephalosporine (2b, 15b, 16b), Carbapeneme (11b, 17b) und Fluorchinolone (18b), sowie Linezolid (19b, 20b) und Tigecyclin (21b) wurden Untersuchungen bei erkrankten Patienten sowie bei gesunden Probanden durchgeführt.

Dabei zeigten die Ergebnisse stets einen mehr oder weniger klinisch relevanten Unterschied zwischen den Plasmakonzentrationen und Konzentrationen von Antiinfektiva im Zielgewebe. Diese Unterschiede variieren stark in Abhängigkeit von Stoffgruppen. Dabei sind solche Eigenschaften wie Molekülgröße, Hydrophilie oder Proteinbindungskapazität von großer Relevanz. Diese Daten konnten den hohen Stellenwert der Mikrodialysetechnik in der Quantifizierung der pharmakokinetischen Eigenschaften unterschiedlicher Antiinfektiva aufzeigen und werden als Grundlage für unserer pharmakokinetische Berechnungen miteinbezogen.

Es wird zur Patientengruppe mit Adipositas eine Kontrollgruppe nicht adipöser Patienten gebildet, die nach Alter, Geschlecht und Art des chirurgischen Eingriffes der Indexgruppe vergleichbar ist. Es werden in beiden Gruppen identische Analgetika und Antibiotika in Standarddosierungen verwendet und identische Untersuchungs- und Messverfahren eingesetzt.

Die perioperative antibiotische Prophylaxe wird **30 Minuten** vor Schnitt appliziert, Dabei werden drei Patientengruppen gebildet, die eine vorgegebene Kombination der Antibiotika erhalten. Begonnen wird mit der ersten Präparategruppe Zusätzlich erfolgt die Infusion vom peripher wirkenden Analgetikum. In jeder Präparategruppe erhalten die ersten in die klinische Prüfung eingeschlossenen Patienten neben dem festgelegten Antibiotikum als Analgetikum das Paracetamol, nach Einschluss der Hälfte der Patienten dieser Präparategruppe wird den folgenden Patienten als Analgetikum Metamizol verabreicht.

| Präparategruppe | Antibiotikum                                  | Peripher wirkendes Analgetikum                |
|-----------------|-----------------------------------------------|-----------------------------------------------|
| Gruppe 1        | 600 mg Linezolid plus<br>1000 mg Meropenem    | 1000 mg Paracetamol bzw.<br>1000 mg Metamizol |
| Gruppe 2        | 100 mg Tigecyclin                             | 1000 mg Paracetamol bzw.<br>1000 mg Metamizol |
| Gruppe 3        | 2000 mg Cefazolin plus<br>500 mg Metronidazol | 1000 mg Paracetamol bzw.<br>1000 mg Metamizol |

Die Dosierungen entsprechen den Dosisempfehlungen der einzelnen Hersteller (siehe Kapitel 5.1).

Alle Patienten erhalten **etwa eine Stunde vor** Einleitung der Allgemeinanästhesie zwei Mikrodialyse-Sonden. Dies ermöglicht die Bewertung der Zuverlässigkeit der Methode durch parallele Messungen in der Gruppe1. Die zweite Sonde wird zusätzlich zur Konzentrationsbestimmung der peripheren Analgetika benutzt. Die Narkoseführung, postoperative Schmerztherapie, Physiotherapie und perioperative Flüssigkeitsmanagement erfolgen nach entsprechenden klinischen Standards der klinischen Routine. Die Daten werden routinemäßig mithilfe der anästhesiologischen Datenmanagementsystems gespeichert. Perioperativ werden Blutproben nach dem Zeit-Schema für pharmakokinetische Berechnungen entnommen und weitere Ergebnisse der präoperativen Labordiagnostik dokumentiert. Während des chirurgischen Eingriffes werden Fettgewebssproben entnommen und für spätere Analysen eingefroren.

### 1.3 Nutzen-Risiko Abschätzung

In der Studie wird überprüft, ob unter den Standarddosierungsschemata bei adipösen Patienten adäquate Konzentrationen von Zielsubstanzen im subkutanen Bindegewebe erreicht werden.

Dabei sollen als Substanzklassen Antibiotika und Analgetika untersucht werden, da diese Medikamente studienunabhängig im Rahmen einer Allgemeinanästhesie zum Einsatz kommen.

Es werden einmalig zur perioperativen Prophylaxe 600 mg Linezolid plus 1000 mg Meropenem kombiniert mit je 1000 mg Paracetamol bzw. Metamizol (Gruppe 1), 100 mg Tigecyclin kombiniert mit je 1000 mg Paracetamol bzw. Metamizol (Gruppe 2), oder 2000 mg Cefazolin plus 500 mg Metronidazol kombiniert mit je 1000 mg Paracetamol bzw. Metamizol (Gruppe 3) appliziert. Die Dosierungen entsprechen den Dosisempfehlungen der einzelnen Hersteller (siehe Kapitel 5.1).

Die Gabe von Cefazolin plus Metronidazol stellt die aktuelle Empfehlung der intraoperativen Antibiotikaprophylaxe zur Risikoreduzierung von Weichteilinfektionen bei chirurgischen Eingriffen dar [19]. Aufgrund des ausschließlich gram+ Wirkspektrums von Linezolid ist die Kombination mit Meropenem, als ausgeprägt gut gram- wirksames Antibiotikum, ratsam und in dieser Kombination häufig verwendet. Tigecyclin kann aufgrund der maximalen Wirkbreite als Monotherapie angewendet werden [26]. Tigecyclin, Linezolid und Meropenem werden als Antibiotikum in der perioperativen Prophylaxe aktuell nur bei Vorhandensein von multiresistenten Erregern eingesetzt. Sie besitzen alle die Zulassung bei Weichteilinfektionen. Aufgrund deren sehr breiten Wirkspektrums einschließlich multiresistenter Erreger sind diese Antibiotika von sehr großer Bedeutung und wissenschaftlichem Interesse [27]. Sie sind deswegen vor allem in der Intensivtherapie bei der antibiotischen Therapie komplizierten Weichteilinfektionen von großer Bedeutung. Durch die Verwendung dieser Medikamente in dieser Studie entsteht bei Einmalgabe kein besonderes Risiko für die Patienten sondern der Nutzen überwiegt. Vielmehr kann dadurch das Risiko von Weichteilinfektionen aufgrund möglicher multiresistenter Erreger reduziert werden.

Alle verwendeten Analgetika kommen studienunabhängig zur perioperativen Schmerztherapie regelhaft zur Anwendung.

Es werden die Konzentrationen der verschiedenen Antibiotika und Analgetika in der interstitiellen Flüssigkeit der Subkutis und in Weichteilen des Operationsgebietes ermittelt, um ein optimiertes Medikament-Dosis-Modell erstellen zu können. Die Ergebnisse der Studie sollen dazu beitragen, dass die adipösen Patienten in der Zukunft eine suffiziente antibiotische Prophylaxe und Therapie erfahren und adäquat analgetisch behandelt werden.

Beide Aspekte haben deutlichen Einfluss auf Morbidität und Mortalität der krankhaft adipösen Patienten, die sich bariatrischen oder anderen größeren chirurgischen Eingriffen unterziehen.

Die Mikrodialyse ist eine erprobte, sichere und gut verträgliche Methode zur Messung der freien Anteile eines Medikamentes im Gewebe [25, 27]. Gelegentlich kann es zur Bildung eines kleinen Blutergusses an der Stelle der eingesetzten Sonde kommen. Die Anlage der Sonden erfolgt **am wachen Patienten vor** Beginn der Allgemeinanästhesie. **Die Größe und Dicke der Mikrodialysesonde entspricht einer gängigen 18G Flexüle für Erwachsene, ist in der Anlage identisch und gleicht somit der geringen Schmerzbelastung der Anlage einer Flexüle.** Somit ist Schmerzbelastung im Zusammenhang mit dem Einsetzen der Mikrodialysesonden als gering einzuschätzen.

Den Patienten werden Blutproben für pharmakokinetische Untersuchungen entnommen. Diese Maßnahme ist unbedenklich. Die gewonnene Menge an Blut stellt für den Patienten keine Gefahr dar. Eine studienbedingte Punktion von Blutgefäßen ist nicht erforderlich, da die Blutproben über Katheter entnommen werden, die im Rahmen der Narkoseführung ohnehin bereits angelegt sind.

Den Patienten werden intraoperativ Fettgewebeproben (0.5-1 g) entnommen. Es wird kein Gewebe für Studienzwecke entnommen, das nicht im Rahmen der Operation ohnehin entfernt wird.

Die in dieser Studie gewonnenen Blut- und Gewebsflüssigkeitsproben unterliegen strengen Maßnahmen zur Sicherung des Datenschutzes. Ein studienbedingtes Risiko für die an der Studie teilnehmenden Patienten besteht nicht. Die zu untersuchende Medikamente werden im Rahmen der

perioperativen antibiotischen Prophylaxe und Analgesie nach medizinischer Indikation verabreicht, die potentiellen Risiken sind also nicht der Studie anzurechnen. Insgesamt ist das zu erwartende Gesamt-Gesundheitsrisiko durch studienbedingte Maßnahmen (Mikrodialyse, Blutabnahmen) als gering einzustufen und das Nutzen/Risiko-Verhältnis als positiv zu bewerten. Der einzelne Patient könnte durch die sorgfältige Evaluierung und Dokumentation von Parametern und Scores profitieren, da durch sorgfältige und engmaschige Überwachung die Wundheilungsstörungen sehr früh identifiziert und behandelt werden können. Außerdem werden die postoperativen Auswertungen von Schmerzenscores dazu beitragen, dass die Studienpatienten zeitnah und adäquat eine analgetische Therapie erhalten.

## **2 STUDIENZIELE**

### **2.1 Primäre Ziele**

Die Erstellung eines optimierten Medikamenten-Dosis Modells durch die Untersuchung von Gewebkonzentrationen an Antibiotika und Analgetika bei adipösen und nicht adipösen Patienten.

### **2.2 Sekundäre Ziele**

Untersuchungen zu Wundinfektionen und Verbesserung der postoperativen Analgesie bei adipösen und nicht adipösen Patienten mit Hilfe des optimierten Medikamenten-Dosis-Modells.

## **3 STUDIENBESCHREIBUNG**

### **3.1 Studiendesign**

Bei der vorliegenden Studie handelt es sich um eine prospektive, offene, monozentrische Untersuchung von adipösen und nicht adipösen Patienten, die einer perioperativen antibiotischen und analgetischen Therapie bedürfen.

### **3.2 Personelle und technische Anforderungen an das Prüfzentrum**

Bei den Prüfarzten muss es sich um eine Anästhesistin/ einen Anästhesisten handeln, der die Narkoseführung, das Monitoring während des operativen Eingriffes und die Prinzipien der antibiotischen Prophylaxe und der postoperativer Schmerztherapie unter fachärztlicher Aufsicht durchführen kann.

Der/die ärztliche Mitarbeiter/-in wird durch die Ausbildung in Mikrodialyse-Technik die notwendigen Probeentnahmen bzw. Messungen vornehmen können. Der für das Projekt beantragte Arzt/Ärztin erlernt zusammen mit dem Hauptantragsteller bei den Kooperationspartnern an der Universität Wien, Österreich, die Mikrodialyse-Technik. Bei den zur Mikrodialyse verwendeten Geräten handelt es sich um für die Anwendung am Patienten nach CE zertifizierte, wissenschaftliche Geräte. Für die Plasma-/Gewebsproben und Mikrodialysate werden eine Kühlzentrifuge und ein Tiefkühlschrank (-80 °C) benötigt.

Das Prüfzentrum verfügt über einen PC mit Internetanschluss (https-Protokoll; Internet Explorer Version 6.0 oder höher) zur elektronischen Datenerfassung.

Die Prüfarzte sollten alle eine entsprechende Qualifikation für die Durchführung einer Studie nach AMG besitzen. Im Vorfeld der Studie wird die Qualifikation und GCP-Kenntnis der Prüfarzte und anderem möglichem Studienpersonal schriftlich abgefragt. Im Zusammenhang mit der Studie finden Informationsveranstaltungen und Schulungsmaßnahmen statt, um die korrekte Durchführung der Studie zu gewährleisten.

### 3.3 Zahl der Patienten

Bei der vorliegenden Studie handelt es sich um eine monozentrische Studie, in die insgesamt 90 Patienten eingeschlossen werden (30 pro Präparategruppe).

Die Fallzahldiskussion ist ausführlich in Kapitel 8.3 aufgeführt.

### 3.4 Erwartete Studiendauer

#### 3.4.1 Dauer der Intervention pro Patient:

Nach der Mikrodialysesondenanlage etwa eine Stunde vor Narkoseeinleitung und Medikamentenapplikation erfolgt die erste Probenentnahme unmittelbar vor der Applikation des zu untersuchenden Medikamentes. Die letzte Probenentnahme wird 8 Stunden nach der Applikation vom Medikament durchgeführt.

#### 3.4.2 Beobachtungszeitraum:

Ab dem Tag des chirurgischen Eingriffes bis zum 7. postoperativen Tag; bei Entlassung aus der Klinik vor dem 7. postoperativen Tag, bis zur Entlassung aus der Klinik.

#### 3.4.3 Dauer (studienbezogen):

Diese klinische Prüfung beginnt mit der ersten unterschriebenen Einwilligungserklärung und endet mit der letzten Visite am 7. postoperativen Tag des letzten Patienten.

Es wird davon ausgegangen, dass das Rekrutierungsziel nach drei Jahren erreicht werden kann. Für die primäre Auswertung werden sechs Monate angesetzt.

### 3.5 Studienabbruch

Das Vorgehen beim Abbruch der Studie für einen einzelnen Patienten wird im Kapitel 6.4.1 erläutert.

#### 3.5.1 Abbruch der Studie

Die Studie kann abgebrochen werden, wenn

- die Studiendurchführung nicht dem Prüfplan genügt
- die Datenqualität unzureichend ist
- bei schwerwiegenden unerwünschten Ereignissen / unverträglicher Toxizität
- Änderungen in der Nutzen-Risiko-Bewertung, z.B. aufgrund von unerwarteten unerwünschten Ereignissen

- neuen Erkenntnissen aus anderen Studien
- es unzureichend rekrutiert

Über den Studienabbruch entscheidet die Studienleitung gegebenenfalls in Abstimmung mit dem Sponsor und dem Biometriker. Die Entscheidung sollte immer begründet werden. Die Weiterbehandlung noch in der Studie befindlicher Patienten wird mit der Studienleitung abgesprochen.

Da die Studie nach den Vorgaben des Arzneimittelgesetzes durchgeführt wird, ist auch eine Rücknahme der Genehmigung bzw. ein Abbruch durch die zuständige Bundesoberbehörde (BfArM) bzw. durch die (federführende) Ethikkommission möglich.

## 4 STUDIENPOPULATION

Im Rahmen dieser klinischen Prüfung werden keine Patienten eingeschlossen, die nach §40 Abs. 4 und §41 Abs. 2 und 3 AMG zu der Gruppe der besonders schutzwürdigen Personen gehören (siehe Kapitel 4.1 und 4.2).

### 4.1 Einschlusskriterien (alle müssen erfüllt sein):

#### 4.1.1 Einschlusskriterien – Untersuchungsgruppe:

- Adipositas ( $\text{BMI} \geq 35 \text{ kg/m}^2$ )
- Alter  $\geq 18$  Jahre
- Patienten, die einem abdominalchirurgischen Eingriff unterzogen werden und bei denen die Notwendigkeit einer perioperativen antibiotischen Prophylaxe und Analgesie besteht
- schriftliche Einwilligung des Patienten liegt vor

#### 4.1.2 Einschlusskriterien – Kontrollgruppe:

- $\text{BMI} \geq 18,5 \text{ kg/m}^2$  und  $\text{BMI} < 30 \text{ kg/m}^2$
- Alter  $\geq 18$  Jahre
- Patienten, die einem abdominalchirurgischen Eingriff unterzogen werden und bei denen die Notwendigkeit einer perioperativen antibiotischen Prophylaxe und Analgesie besteht
- schriftliche Einwilligung des Patienten liegt vor

### 4.2 Ausschlusskriterien

#### 4.2.1 Ausschlusskriterien – Präparatengruppe 1 (Linezolid, Meropenem und Paracetamol/Metamizol):

Patienten dürfen nicht an der klinischen Prüfung teilnehmen, sobald EINES der folgenden Kriterien zutrifft:

- Patienten, die in den 72 Stunden vor dem operativen Eingriff eine Therapie mit der Studienmedikation erhalten haben

- Bekannte allergische Reaktion, **Überempfindlichkeit** bzw. Kontraindikation gegenüber Propacetamol-HCl bzw. Metamizol-Natrium, Carbapenem-Antibiotika,  $\beta$ -Laktam-Antibiotika (z. B. Penicilline, Cephalosporine), Pyrazolone und Pyrazolidine
- Schwere Leberinsuffizienz
- Patienten mit Störungen der Knochenmarkfunktion (z. B. nach Zytostatikabehandlung) oder Erkrankungen des hämatopoetischen Systems
- genetisch bedingter Glukose-6-Phosphat-Dehydrogenase-Mangel,
- akute hepatische Porphyrie,
- bestehende Hypotonie,
- Patienten mit Phenylketonurie, hereditärer Fructose-Intoleranz,
- innerhalb der letzten zwei Wochen Einnahme von Medikamenten, die die Monoaminoxidase A oder B (z. B. Phenelzin, Isocarboxazid, Selegilin, Moclobemid) hemmen
- Frauen während der Schwangerschaft und Stillzeit (positiver Schwangerschaftstest bei Frauen im gebärfähigen Alter)
- Teilnahme an anderen interventionellen Therapiestudien nach AMG

#### **4.2.2 Ausschlusskriterien – Präparategruppe 2 (Tigecyclin und Paracetamol/ Metamizol):**

Patienten dürfen nicht an der klinischen Prüfung teilnehmen, sobald EINES der folgenden Kriterien zutrifft:

- Patienten, die in den 72 Stunden vor dem operativen Eingriff eine Therapie mit der Studienmedikation erhalten haben
- Bekannte allergische Reaktion, **Überempfindlichkeit** bzw. Kontraindikation gegenüber Propacetamol-HCl bzw. Metamizol-Natrium, Tigecyclin, Antibiotika der Tetracyclin-Gruppe
- Schwere Leberinsuffizienz
- Störungen der Knochenmarkfunktion, Erkrankungen des hämatopoetischen Systems, genetisch bedingter Glucose-6-Phosphat-Dehydrogenase-Mangel (Hämolysegefahr),
- akute hepatische Porphyrie
- bestehende Hypotonie
- Frauen während der Schwangerschaft und Stillzeit (positiver Schwangerschaftstest bei Frauen im gebärfähigen Alter)
- Teilnahme an anderen interventionellen Therapiestudien nach AMG

#### **4.2.3 Ausschlusskriterien – Präparategruppe 3 (Cefazolin, Metronidazol und Paracetamol/Metamizol):**

Patienten dürfen nicht an der klinischen Prüfung teilnehmen, sobald EINES der folgenden Kriterien zutrifft:

- Patienten, die in den 72 Stunden vor dem operativen Eingriff eine Therapie mit der Studienmedikation erhalten haben

- Bekannte allergische Reaktion, **Überempfindlichkeit** bzw. Kontraindikation gegenüber **Propacetamol-HCl** bzw. **Metamizol-Natrium**, **Cephalosporine**, **andere Cephalosporine**, **5-Nitroimidazole**
- **Schwere Leberinsuffizienz**
- **Störungen der Knochenmarkfunktion, Erkrankungen des hämatopoetischen Systems, Genetisch bedingter Glucose-6-Phosphat-Dehydrogenase-Mangel (Hämolysegefahr),**
- **akute hepatische Porphyrrie**
- **genetisch bedingter Glukose-6-Phosphat-Dehydrogenase-Mangel,**
- **bestehende Hypotonie**
- **eingeschränkte Nierenfunktion (Kreatinin-Clearance < 35 ml/min)**
- Frauen während der Schwangerschaft und Stillzeit (positiver Schwangerschaftstest bei Frauen im gebärfähigen Alter)
- Teilnahme an anderen interventionellen Therapiestudien nach AMG

### 4.3 Teilnahme an mehreren klinischen Prüfungen

Im Rahmen der Prüfung der Ein- und Ausschlusskriterien kontrolliert der Prüfer, ob der Patient/ die Patientin gleichzeitig an anderen interventionellen klinischen Prüfungen nach AMG teilnimmt bzw. in den letzten 30 Tagen teilgenommen hat. Sollte dies der Fall sein, erfolgt kein Studieneinschluss. Zusätzlich bestätigt der Patient /die Patientin durch die Unterzeichnung der Einwilligungserklärung, dass er/sie nicht gleichzeitig an anderen interventionellen klinischen Prüfungen nach AMG teilnimmt.

### 4.4 Erklärung zur Einbeziehung abhängiger Personen

Im Rahmen des Patienteneinschlusses wird durch Befragung überprüft, ob die potenziellen Prüfungsteilnehmer in irgendeiner Weise vom Prüfarzt, Studienleiter oder Sponsor abhängig sein könnten (z. B. Verwandtschaft, Mitarbeiter). Sollte eine Abhängigkeit vermutet werden, findet kein Studieneinschluss statt.

### 4.5 Begründung der Geschlechterverteilung

Nach Angaben des Statistischen Bundesamtes unterscheidet sich die Häufigkeit der Adipositas in Deutschland zwischen den Geschlechtern nicht [22,23]. Einige Publikationen und die klinikinterne Recherche deuten dabei daraufhin, dass der Anteil an Frauen mit Adipositas unter den Patienten, die sich einem chirurgischen Eingriff unterziehen, höher liegt als der der Männer [21]. Somit erwarten wir eine Frauenquote von 60 bis 80%. Es wird zur Patientengruppe mit Adipositas eine Kontrollgruppe nicht adipöser Patienten gebildet, die nach Variable Geschlecht der Indexgruppe vergleichbar ist.

## 5 PRÜFTHERAPIE

### 5.1 Prüfpräparate

Es werden handelsübliche, zugelassene Medikamente verwendet. Eine Prüfmusterkennzeichnung ist nach §42 AMG und §5 GCP-V nicht notwendig. Festgeschrieben für diese klinische Prüfung sind die in den Kap. 5.1.1 bis 5.1.3 aufgeführten Wirkstoffe, es können also alle in Deutschland zugelassenen Arzneimittel mit diesen Wirkstoffen zum Einsatz kommen. Die in den folgenden Übersichten (Kap. 5.1.1 bis 5.1.3) aufgeführten Arzneimittel werden nach dem derzeitigen Stand über die Krankenhausapotheke zur Verfügung gestellt und stehen als Beispiel für mögliche Präparate, sind aber für die klinische Prüfung nicht bindend.

#### 5.1.1 Präparategruppe 1 (Linezolid, Meropenem und Paracetamol/Metamizol)

##### Linezolid

|                                        |                                                                                                                                                                                                                                                                                                                                |
|----------------------------------------|--------------------------------------------------------------------------------------------------------------------------------------------------------------------------------------------------------------------------------------------------------------------------------------------------------------------------------|
| Wirkstoff                              | Linezolid                                                                                                                                                                                                                                                                                                                      |
| Handelsname Prüfpräparat               | Zyvoxid® / Pfizer Deutschland GmbH                                                                                                                                                                                                                                                                                             |
| Bereitstellung Prüfpräparat            | Krankenhausapotheke                                                                                                                                                                                                                                                                                                            |
| Verwendete Arzneiform / Stärke         | Infusionslösung / 1 ml Infusionslösung enthält 2 mg Linezolid                                                                                                                                                                                                                                                                  |
| Verpackung                             | Infusionsbeutel mit jeweils 300 ml                                                                                                                                                                                                                                                                                             |
| Lagerung / Aufbewahrungshinweis        | Das Behältnis bis zur Anwendung in der Originalverpackung (Schutzfolie und Umkarton) bei Raumtemperatur aufzubewahren.                                                                                                                                                                                                         |
| Haltbarkeit                            | Nach dem Öffnen soll die Lösung sofort verwendet werden                                                                                                                                                                                                                                                                        |
| Vorsichtsmaßnahmen, Inkompatibilitäten | Zyvoxid Infusionslösung zeigt physikalische Inkompatibilität mit den folgenden Substanzen: Amphotericin B, Chlorpromazinhydrochlorid, Diazepam, Pentamidin, Isothionat, Erythromycinlactobionat, Natriumphenytoin und Sulfamethoxazol/Trimethoprim. Zusätzlich besteht eine chemische Inkompatibilität mit Ceftriaxon-Natrium. |

##### Meropenem

|                                |                                                                                                                    |
|--------------------------------|--------------------------------------------------------------------------------------------------------------------|
| Wirkstoff                      | Meropenem                                                                                                          |
| Handelsname Prüfpräparat       | Meronem® / AstraZeneca GmbH                                                                                        |
| Bereitstellung Prüfpräparat    | Krankenhausapotheke                                                                                                |
| Verwendete Arzneiform          | Pulver zur Herstellung einer Injektionslösung oder Infusionslösung                                                 |
| Stärke                         | Jede Durchstechflasche enthält Meropenem 3 H <sub>2</sub> O entsprechend 1000 mg Meropenem                         |
| Hilfsstoffe                    | Jede 1000-mg-Durchstechflasche enthält 208 mg Natriumcarbonat entsprechend etwa 4,0 mmol Natrium (ungefähr 90 mg). |
| Verpackung                     |                                                                                                                    |
| Lagerung/ Aufbewahrungshinweis | Zur intravenösen Infusion können Durchstechflaschen mit                                                            |

|                                        |                                                                                                                                                                                                                                                                                                                                                |
|----------------------------------------|------------------------------------------------------------------------------------------------------------------------------------------------------------------------------------------------------------------------------------------------------------------------------------------------------------------------------------------------|
| Haltbarkeit                            | <p>Meropenem direkt mit 0,9%igem Natriumchlorid oder 5%iger Glukoselösung zur Infusion zubereitet werden.</p> <p>Jede Durchstechflasche ist zum einmaligen Gebrauch bestimmt. Eine gebrauchsfertige Lösung von Meronem sollte sofort verwendet werden</p> <p>Nicht über 30 °C lagern.</p> <p>Die gebrauchsfertige Lösung nicht einfrieren.</p> |
| Vorsichtsmaßnahmen, Inkompatibilitäten | <p>Das Arzneimittel darf nicht mit anderen Arzneimitteln gemischt werden.</p> <p>Jede Durchstechflasche ist zum einmaligen Gebrauch bestimmt.</p>                                                                                                                                                                                              |

### Paracetamol

|                                        |                                                                                                                                                                                                                                                                                                                                                                                                 |
|----------------------------------------|-------------------------------------------------------------------------------------------------------------------------------------------------------------------------------------------------------------------------------------------------------------------------------------------------------------------------------------------------------------------------------------------------|
| Wirkstoff                              | Paracetamol                                                                                                                                                                                                                                                                                                                                                                                     |
| Handelsname Prüfpräparat               | Perfalgan® / Bristol-Myers Squibb                                                                                                                                                                                                                                                                                                                                                               |
| Bereitstellung Prüfpräparat            | Krankenhausapotheke                                                                                                                                                                                                                                                                                                                                                                             |
| Verwendete Arzneiform/ Stärke          | Eine 100 ml Durchstechflasche enthält 1000 mg Paracetamol.                                                                                                                                                                                                                                                                                                                                      |
| Hilfsstoffe                            | Cysteinhydrochlorid-Monohydrat, Natriummonohydrogenphosphat-Dihydrat, Salzsäure, Mannitol, Natriumhydroxid, Wasser für Injektionszwecke                                                                                                                                                                                                                                                         |
| Verpackung                             | <p>100ml Durchstechflaschen aus farblosem Glas der hydrolytischen Klasse II mit Brombutyl-Stopfen und Bordelkappe aus Aluminium/Plastik.</p> <p>Packungsgröße: Packung mit 12 Durchstechflaschen</p>                                                                                                                                                                                            |
| Lagerung/ Aufbewahrungshinweis         | Nicht über 30 °C lagern. Nicht im Kühlschrank lagern oder einfrieren.                                                                                                                                                                                                                                                                                                                           |
| Haltbarkeit                            | Nach dem Öffnen soll die Lösung sofort verwendet werden.                                                                                                                                                                                                                                                                                                                                        |
| Vorsichtsmaßnahmen, Inkompatibilitäten | <p>Die Lösung darf nicht mit anderen Arzneimitteln gemischt werden.</p> <p>Es ist eine 0,8 mm Nadel zu benutzen und der Stopfen sollte vertikal an der gekennzeichneten Stelle durchstoßen werden. Vor der Anwendung sollte das Arzneimittel visuell auf Verunreinigungen und Verfärbungen untersucht werden. Nur zur einmaligen Anwendung. Jede nicht verbrauchte Lösung ist zu verwerfen.</p> |

### Metamizol

|                          |                                             |
|--------------------------|---------------------------------------------|
| Wirkstoff                | Metamizol                                   |
| Handelsname Prüfpräparat | Novaminsulfon-ratiopharm® / ratiopharm GmbH |

|                                             |                                                                                                                                                              |
|---------------------------------------------|--------------------------------------------------------------------------------------------------------------------------------------------------------------|
| Bereitstellung Prüfpräparat                 | Krankenhausapotheke                                                                                                                                          |
| Verwendete Arzneiform/ Stärke / Hilfsstoffe | Jede Ampulle mit 2 ml Injektionslösung enthält 1 g Metamizol-Natrium 1 H <sub>2</sub> O.<br>Wasser für Injektionszwecke.                                     |
| Verpackung                                  | Packung mit 5 Ampullen. Packung mit 10 Ampullen.                                                                                                             |
| Lagerung/ Aufbewahrungshinweis              | Die Ampullen im Umkarton aufbewahren, um den Inhalt vor Licht zu schützen.                                                                                   |
| Haltbarkeit                                 | Dieses Arzneimittel soll nach Ablauf des Verfallsdatums nicht mehr angewendet werden.                                                                        |
| Vorsichtsmaßnahmen, Inkompatibilitäten      | Wegen der Möglichkeit von Inkompatibilitäten wird empfohlen, die Injektionslösung nicht mit anderen Therapeutika gemischt zu injizieren oder zu infundieren. |

### 5.1.2 Präparategruppe 2 (Tigecyclin und Paracetamol/Metamizol)

#### Tigecyclin

|                                              |                                                                                                                                                                                                                                                                                                                                                                                                                                                                                                                                              |
|----------------------------------------------|----------------------------------------------------------------------------------------------------------------------------------------------------------------------------------------------------------------------------------------------------------------------------------------------------------------------------------------------------------------------------------------------------------------------------------------------------------------------------------------------------------------------------------------------|
| Wirkstoff                                    | Tigecyclin                                                                                                                                                                                                                                                                                                                                                                                                                                                                                                                                   |
| Handelsname Prüfpräparat                     | Tygacil® / Pfizer Deutschland GmbH                                                                                                                                                                                                                                                                                                                                                                                                                                                                                                           |
| Bereitstellung Prüfpräparat                  | Krankenhausapotheke                                                                                                                                                                                                                                                                                                                                                                                                                                                                                                                          |
| Verwendete Arzneiform / Stärke / Hilfsstoffe | Pulver zur Herstellung einer Infusionslösung<br>Jede 5-ml-Durchstechflasche Tygacil enthält 50 mg Tigecyclin.<br>Nach Rekonstitution enthält 1ml Lösung 10mg Tigecyclin.<br>Lactose-Monohydrat, Salzsäure, Natriumhydroxid (zur pH-Einstellung)                                                                                                                                                                                                                                                                                              |
| Verpackung                                   | 5-ml-Klorglas-Durchstechflasche (Typ 1) mit grauen Butylgummistopfen und versiegelt mit einer Aluminiumverschlusskappe mit Aufreißlasche. Tygacil wird in einer Packung mit 10 Durchstechflaschen geliefert.                                                                                                                                                                                                                                                                                                                                 |
| Lagerung/ Aufbewahrungshinweis               | Unter 25 °C lagern                                                                                                                                                                                                                                                                                                                                                                                                                                                                                                                           |
| Haltbarkeit                                  | Nach der Rekonstitution und Verdünnung im Beutel oder in einem anderen geeigneten Infusionsbehälter (z. B. Glasflasche) sollte Tigecyclin sofort angewendet werden.                                                                                                                                                                                                                                                                                                                                                                          |
| Vorsichtsmaßnahmen, Inkompatibilitäten       | Das lyophilisierte Pulver sollte mit 5,3 ml einer 9 mg/ml (0,9%) Natriumchlorid-Injektionslösung, 50 mg/ml (5%) Dextrose-Injektionslösung oder Ringer-Lactat-Injektionslösung rekonstituiert werden, um eine Konzentration von 10 mg Tigecyclin/ml zu erhalten. Die Durchstechflasche sollte leicht mit kreisenden Bewegungen geschwenkt werden, bis sich das Arzneimittel aufgelöst hat. Anschließend sollten 5 ml der rekonstituierten Lösung sofort aus der Durchstechflasche entnommen und in einen 100-ml-Beutel zur i.v.-Infusion oder |

|  |                                                                                                                                                          |
|--|----------------------------------------------------------------------------------------------------------------------------------------------------------|
|  | ein anderes geeignetes Infusionsbehältnis (wie z. B. Glasflasche) gegeben werden. Das Arzneimittel soll nicht mit anderen Arzneimitteln gemischt werden. |
|--|----------------------------------------------------------------------------------------------------------------------------------------------------------|

Paracetamol und Metamizol (siehe Kap. 5.1.1)

### 5.1.3 Präparategruppe 3 (Cefazolin, Metronidazol und Paracetamol/Metamizol)

#### Cefazolin

|                                                |                                                                                                                                                                                                                                                                                                                                                                                                                                                                                                                                                                                                        |
|------------------------------------------------|--------------------------------------------------------------------------------------------------------------------------------------------------------------------------------------------------------------------------------------------------------------------------------------------------------------------------------------------------------------------------------------------------------------------------------------------------------------------------------------------------------------------------------------------------------------------------------------------------------|
| Wirkstoff                                      | Cefazolin                                                                                                                                                                                                                                                                                                                                                                                                                                                                                                                                                                                              |
| Handelsname Prüfpräparat                       | Cephazolin Fresenius / Fresenius Kabi                                                                                                                                                                                                                                                                                                                                                                                                                                                                                                                                                                  |
| Bereitstellung Prüfpräparat                    | Krankenhausapotheke                                                                                                                                                                                                                                                                                                                                                                                                                                                                                                                                                                                    |
| Verwendete Arzneiform / Stärke / Hilfsstoffe   | Pulver zur Herstellung einer Injektions- oder Infusionslösung<br>Jede Durchstechflasche enthält 2,096 g Cephazolin-Natrium (entsprechend 2,0 g Cephazolin). Natriumgehalt: 96 mg (4,2 mmol).<br>Das Arzneimittel enthält keine sonstigen Bestandteile oder Konservierungsmittel.                                                                                                                                                                                                                                                                                                                       |
| Verpackung                                     | Durchstechflaschen aus Glas zu 15 ml mit Gummistopfen mit Aluminiumkappe. Durchstechflaschen aus Glas zu 100ml mit Gummistopfen mit Aluminiumkappe.<br>Packungsgrößen: 10× 2 g Pulver zur Herstellung einer Injektions- oder Infusionslösung.                                                                                                                                                                                                                                                                                                                                                          |
| Lagerung / Aufbewahrungshinweis<br>Haltbarkeit | Die gebrauchsfertige Zubereitung soll sofort verwendet werden.<br>Die Durchstechflasche ist im Umkarton aufzubewahren, um den Inhalt vor Licht zu schützen. Die gebrauchsfertige Lösung ist vor Licht zu schützen.                                                                                                                                                                                                                                                                                                                                                                                     |
| Vorsichtsmaßnahmen,<br>Inkompatibilitäten      | Herstellung der gebrauchsfertigen Lösung:<br>bei der Kurzinfusion von Cephazolin Fresenius 2 g werden 2 g Cephazolin Pulver in der 100 ml Durchstechflasche durch leichtes Schütteln mit 100 ml isotonischer Natriumchloridlösung oder 5%ige Glucoselösung gelöst.<br>Cephazolin Fresenius 2 g ist inkompatibel mit Amikacindisulfat, Amobarbital-Natrium, Bleomycinsulfat, Calciumgluceptat, Calciumgluconat, Cimetidinhydrochlorid, Colistinmethat-Natrium, Erythromyngluceptat, Kanamycinsulfat, Oxytetracyclinhydrochlorid, Pentobarbital-Natrium, Polymyxin-B-sulfat und Tetracyclinhydrochlorid. |

**Metronidazol**

|                                               |                                                                                                                                                                                                                                                                                                                                          |
|-----------------------------------------------|------------------------------------------------------------------------------------------------------------------------------------------------------------------------------------------------------------------------------------------------------------------------------------------------------------------------------------------|
| Wirkstoff                                     | Metronidazol                                                                                                                                                                                                                                                                                                                             |
| Handelsname Prüfpräparat                      | Metronidazol Fresenius / Fresenius Kabi                                                                                                                                                                                                                                                                                                  |
| Bereitstellung Prüfpräparat                   | Krankenhausapotheke                                                                                                                                                                                                                                                                                                                      |
| Verwendete Arzneiform / Stärke / Hilfsstoffe  | Metronidazol Fresenius 500 mg/100 ml Infusionslösung<br>Natriumchlorid Dinatriumhydrogenphosphat 12 H <sub>2</sub> O<br>Citronensäure-Monohydrat<br>Wasser für Injektionszwecke                                                                                                                                                          |
| Verpackung                                    | Durchstechflaschen (100 ml) aus farblosem Glas (Typ II Glas) oder Polyethylen (Kabi-Pac®). Die Glasdurchstechflaschen sind mit einem Verschluss aus Halobutyl-Gummi und Aluminiumkappen versehen.<br><br>Packungen mit 1, 5, 10 oder 12 Durchstechflaschen zu je 100ml Infusionslösung.                                                  |
| Lagerung / Aufbewahrungshinweis / Haltbarkeit | Die Durchstechflaschen sind im Umkarton aufzubewahren, um den Inhalt vor Licht zu schützen.<br><br>Vor dem Öffnen: 3 Jahre<br>Nach dem Öffnen soll die Lösung sofort verwendet werden.                                                                                                                                                   |
| Vorsichtsmaßnahmen, Inkompatibilitäten        | Metronidazol Fresenius kann auch als intravenöse Infusion zusammen mit 0,9%iger Natriumchloridlösung, Glucose-Salz-Lösungen, 5%iger Glucoselösung, Kaliumchloridlösungen (20mmol, 40 mmol) und Ringerlösung verabreicht werden. Das Arzneimittel darf, außer mit den oben aufgeführten, nicht mit anderen Arzneimitteln gemischt werden. |

Paracetamol und Metamizol (siehe Kap. 5.1.1)

## 5.2 Verwaltung der Prüfpräparate / Drug Accountability

Alle Präparate sind zugelassene Arzneimittel und ohne zusätzliche Herstellungsmaßnahmen zur Verwendung in der hier beschriebenen klinischen Prüfung bestimmt.

## 5.3 Hinweise zur Anwendung der Prüfpräparate

### 5.3.1 Behandlungsschema

In dieser klinischen Prüfung kommen die im Abschnitt 5.1 beschriebenen Präparategruppen zum Einsatz. In allen Gruppen wird die perioperative antibiotische Prophylaxe 1 Stunde vor dem Schnitt appliziert. Zusätzlich erfolgt danach die Infusion vom peripher wirkenden Analgetikum. Die Kombination der Antibiotika mit Analgetika in den drei Präparategruppen ist in der folgenden Tabelle dargestellt.

Tabelle 1. Präparategruppen

| Präparategruppe | Antibiotikum                                | Peripher wirkendes Analgetikum                |
|-----------------|---------------------------------------------|-----------------------------------------------|
| Gruppe 1        | 600 mg Linezolid +<br>1000 mg Meropenem     | 1000 mg Paracetamol bzw. 1000 mg<br>Metamizol |
| Gruppe 2        | 100 mg Tigecyclin                           | 1000 mg Paracetamol bzw. 1000 mg<br>Metamizol |
| Gruppe 3        | 2000 mg Cephazolin +<br>500 mg Metronidazol | 1000 mg Paracetamol bzw. 1000 mg<br>Metamizol |

### 5.3.2 Zeitpunkt und Art der Verabreichung

Jeder in die klinische Prüfung eingeschlossene Patient wird einer der o. g. Präparategruppen zugeteilt und erhält das der jeweiligen Gruppe zugeordnete Antibiotikum bzw. die Antibiotika-Kombination als perioperative Antibiotikaphylaxe 1 Stunde vor geplantem Hautschnitt. Gefolgt von der Infusion des Antibiotikums/der Antibiotika erhalten die Patienten eines der vorgegebenen peripheren Analgetika. Die Zuteilung der Patienten erfolgt zunächst in die Präparategruppe 1, nach Erreichen des Rekrutierungsziels in die Präparategruppe 2 und anschließend in die Präparategruppe 3. Innerhalb der jeweiligen Präparategruppe erhält die erste Hälfte der eingeschlossenen Patienten als Analgetikum das Paracetamol, die zweite Hälfte das Metamizol.

Alle Medikamentenapplikationen erfolgen unter Einhalten der Mindestinfusionsdauer als intravenöse Infusionen über separate Infusionsleitungen.

### 5.3.3 Gesamtdosis

Im Sinne der perioperativen Antibiotikaphylaxe erfolgt eine einmalige Gabe der in den Präparategruppen eingesetzten Medikamente entsprechend der vom Hersteller empfohlenen Dosierungen (s. Tabelle 1).

### 5.3.4 Compliance

Da die Prüfmedikation im Rahmen der perioperativen antibiotischen Prophylaxe und Analgesie durch das Behandlungspersonal verabreicht wird, sind hinsichtlich der Patientencompliance zur Medikamenteneinnahme keinerlei Probleme zu erwarten. Die Verabreichung der Prüfmedikation wird durch das Prüfpersonal dokumentiert.

### 5.3.5 Verzeichnis der Nebenwirkungen

Die zu untersuchenden Medikamente werden im Rahmen der perioperativen antibiotischen Prophylaxe und Analgesie nach medizinischer Indikation verabreicht.

Gemäß den Fachinformationen sind folgende Nebenwirkungen bekannt:

#### Präparategruppe 1 (Linezolid, Meropenem und Paracetamol/Metamizol)

##### Linezolid:

| Organsystem | Häufig<br>( $\geq 1/100$ bis $< 1/10$ ) | Gelegentlich<br>( $\geq 1/1000$ bis $< 1/100$ ) | Selten<br>( $\geq 1/10.000$ bis $< 1/1000$ ) | Sehr selten<br>( $< 1/10.000$ ) |
|-------------|-----------------------------------------|-------------------------------------------------|----------------------------------------------|---------------------------------|
|             |                                         |                                                 |                                              |                                 |

| <b>Organsystem</b>                                    | <b>Häufig</b><br>( $\geq 1/100$ bis $< 1/10$ )                               | <b>Gelegentlich</b><br>( $\geq 1/1000$ bis $< 1/100$ )                                                                                                                                                            | <b>Selten</b><br>( $\geq 1/10.000$ bis $< 1/1000$ ) | <b>Sehr selten</b><br>( $< 1/10.000$ ) |
|-------------------------------------------------------|------------------------------------------------------------------------------|-------------------------------------------------------------------------------------------------------------------------------------------------------------------------------------------------------------------|-----------------------------------------------------|----------------------------------------|
| Infektionen und parasitäre Erkrankungen               | Candidiasis, orale<br>Candidiasis, vaginale<br>Candidiasis, Mykosen          | Vaginitis                                                                                                                                                                                                         |                                                     |                                        |
| Erkrankungen des Blutes und des Lymphsystems          |                                                                              | Leukopenie,<br>Neutropenie,<br>Thrombozytopenie,<br>Eosinophilie                                                                                                                                                  |                                                     |                                        |
| Psychiatrische Erkrankungen                           |                                                                              | Schlaflosigkeit                                                                                                                                                                                                   |                                                     |                                        |
| Erkrankungen des Nervensystems                        | Kopfschmerzen,<br>Geschmacksstörungen<br>(metallischer Geschmack)            | Schwindel, Hypästhesie, Parästhesie                                                                                                                                                                               |                                                     |                                        |
| Augenerkrankungen                                     |                                                                              | Verschwommenes Sehen*                                                                                                                                                                                             |                                                     |                                        |
| Erkrankungen des Ohrs und des Labyrinths              |                                                                              | Tinnitus                                                                                                                                                                                                          |                                                     |                                        |
| Erkrankungen des Herzens                              |                                                                              |                                                                                                                                                                                                                   | Arrhythmie<br>(Tachykardie)                         |                                        |
| Gefäßerkrankungen                                     |                                                                              | Hypertonie, Phlebitis,<br>Thrombophlebitis                                                                                                                                                                        | transiente<br>ischämische<br>Attacken               |                                        |
| Erkrankungen des Gastrointestinaltrakts               | Diarrhoe, Übelkeit,<br>Erbrechen                                             | Pankreatitis, Gastritis,<br>lokalisierte oder allg.<br>Abdominalschmerzen,<br>Obstipation,<br>Mundtrockenheit,<br>Dyspepsie, Glossitis,<br>weicher Stuhl,<br>Stomatitis,<br>Zungenverfärbung<br>oder -veränderung |                                                     |                                        |
| Leber- und Gallenerkrankungen                         | veränderte Leberfunktionstests; erhöhte AST, ALT oder alkalische Phosphatase | erhöhtes Gesamtbilirubin                                                                                                                                                                                          |                                                     |                                        |
| Erkrankungen der Haut und des Unterhautzellgewebes    |                                                                              | Urtikaria, Dermatitis,<br>Diaphoresis, Pruritus,<br>Hautausschlag                                                                                                                                                 |                                                     |                                        |
| Erkrankungen der Nieren und Harnwege                  | erhöhte Blutharnstoffwerte                                                   | Polyurie, erhöhte Kreatininwerte                                                                                                                                                                                  | Nierenversagen                                      |                                        |
| Erkrankungen der Geschlechtsorgane und der Brustdrüse |                                                                              | vulvovaginale Störungen                                                                                                                                                                                           |                                                     |                                        |
| allg. Störungen und Störungen am Anwendungsort        |                                                                              | Schüttelfrost,<br>Müdigkeit, Fieber,<br>Schmerzen an der Injektionsstelle,<br>vermehrter Durst,<br>lokalisierte Schmerzen                                                                                         |                                                     |                                        |
| Untersuchungen                                        | Klin. Chemie: erhöhte LDH, Kreatinkinase, Lipase, Amylase der                | Klin. Chemie: erhöhtes Natrium oder Kalzium; reduzierter                                                                                                                                                          |                                                     |                                        |

| Organsystem | Häufig<br>( $\geq 1/100$ bis $< 1/10$ )                                                                                                                                                                                                                                                                                                       | Gelegentlich<br>( $\geq 1/1000$ bis $< 1/100$ )                                                                                                   | Selten<br>( $\geq 1/10.000$ bis $< 1/1000$ ) | Sehr selten<br>( $< 1/10.000$ ) |
|-------------|-----------------------------------------------------------------------------------------------------------------------------------------------------------------------------------------------------------------------------------------------------------------------------------------------------------------------------------------------|---------------------------------------------------------------------------------------------------------------------------------------------------|----------------------------------------------|---------------------------------|
|             | Glucose (nicht nüchtern); vermindertes Gesamteiweiß, Albumin, Natrium oder Kalzium; erhöhtes oder reduziertes Kalium oder Bicarbonat<br><u>Hämatologie</u> : erhöhte Neutrophilenzahl oder Eosinophilenzahl; reduziertes Hämoglobin, Hämatokrit oder reduzierte Erythrozytenzahl; erhöhte oder reduzierte Thrombozyten- oder Leukozytenzahlen | Glucosespiegel (nicht nüchtern); erhöhtes oder reduziertes Chlorid<br><u>Hämatologie</u> : erhöhte Retikulozytenzahl; reduzierte Neutrophilenzahl |                                              |                                 |

**Meropenem**

| Organsystem                                        | Häufig<br>( $\geq 1/100$ bis $< 1/10$ )                                                                                | Gelegentlich<br>( $\geq 1/1000$ bis $< 1/100$ )          | Selten<br>( $\geq 1/10.000$ bis $< 1/1000$ ) | Sehr selten<br>( $< 1/10.000$ ) |
|----------------------------------------------------|------------------------------------------------------------------------------------------------------------------------|----------------------------------------------------------|----------------------------------------------|---------------------------------|
| Infektionen und parasitäre Erkrankungen            |                                                                                                                        | Orale und vaginale Candidosen                            |                                              |                                 |
| Erkrankungen des Blutes und des Lymphsystems       | Thrombozythämie                                                                                                        | Eosinophilie, Thrombozytopenie, Neutropenie              |                                              |                                 |
| Erkrankungen des Nervensystems                     | Kopfschmerzen                                                                                                          | Parästhesien                                             | Krampfanfälle                                |                                 |
| Erkrankungen des Gastrointestinaltrakts            | Durchfall, Erbrechen, Übelkeit, Bauchschmerzen                                                                         |                                                          |                                              |                                 |
| Leber- und Gallenerkrankungen                      | Anstieg der Serumkonzentration der Transaminasen, Anstieg der alkalischen Phosphatase, Anstieg der Laktatdehydrogenase | Anstieg des Bilirubinwertes                              |                                              |                                 |
| Erkrankungen der Haut und des Unterhautzellgewebes | Ausschlag, Juckreiz                                                                                                    | Urtikaria                                                |                                              |                                 |
| Erkrankungen der Nieren und Harnwege               |                                                                                                                        | Anstieg des Kreatininwertes, Anstieg des Harnstoffwertes |                                              |                                 |
| allg. Störungen und Störungen am Anwendungsort     | Entzündung, Schmerzen                                                                                                  | Thrombophlebitis                                         |                                              |                                 |

**Paracetamol**

| Organsystem | Häufig<br>( $\geq 1/100$ bis $< 1/10$ ) | Gelegentlich<br>( $\geq 1/1000$ bis $< 1/100$ ) | Selten<br>( $\geq 1/10.000$ bis $< 1/1000$ ) | Sehr selten<br>( $< 1/10.000$ ) |
|-------------|-----------------------------------------|-------------------------------------------------|----------------------------------------------|---------------------------------|
| Allgemein   |                                         |                                                 | Unwohlsein                                   | Überempfindlichkeits-           |

| Organsystem                                  | Häufig<br>( $\geq 1/100$ bis $< 1/10$ ) | Gelegentlich<br>( $\geq 1/1000$ bis $< 1/100$ ) | Selten<br>( $\geq 1/10.000$ bis $< 1/1000$ ) | Sehr selten<br>( $< 1/10.000$ )           |
|----------------------------------------------|-----------------------------------------|-------------------------------------------------|----------------------------------------------|-------------------------------------------|
|                                              |                                         |                                                 |                                              | reaktion                                  |
| Herz-Kreislauf                               |                                         |                                                 | Hypotonie                                    |                                           |
| Erkrankungen des Blutes und des Lymphsystems |                                         |                                                 |                                              | Thrombozytopenie, Leukopenie, Neutropenie |
| Leber                                        |                                         |                                                 | Anstieg der Lebertransaminasen               |                                           |

**Metamizol**

| Organsystem                                        | Häufig<br>( $\geq 1/100$ bis $< 1/10$ ) | Gelegentlich<br>( $\geq 1/1000$ bis $< 1/100$ ) | Selten<br>( $\geq 1/10.000$ bis $< 1/1000$ )         | Sehr selten<br>( $< 1/10.000$ )                                                            |
|----------------------------------------------------|-----------------------------------------|-------------------------------------------------|------------------------------------------------------|--------------------------------------------------------------------------------------------|
| Erkrankungen des Immunsystems                      |                                         |                                                 | anaphylaktoide oder anaphylaktische Reaktionen       | anaphylaktoide oder anaphylaktische Reaktionen mit schwerem / lebensbedrohlichem Verlauf   |
| Gefäßerkrankungen                                  |                                         |                                                 | hypotensive Reaktionen                               |                                                                                            |
| Erkrankungen des Blutes und des Lymphsystems       |                                         |                                                 | Leukopenie                                           | Agranulozytose, Thrombozytopenie                                                           |
| Erkrankungen der Haut und des Unterhautzellgewebes |                                         |                                                 | fixes Arzneimittel-exanthem, andere Exantheme (Rash) |                                                                                            |
| Sonstige Reaktionen                                |                                         |                                                 |                                                      | Nierenfunktionsstörung mit Anurie oder Oligurie, Proteinurie und interstitieller Nephritis |

Bei ggf. auftretenden Nebenwirkungen wird der Patient vom behandelnden Prüfarzt nach Stand der Wissenschaft und der besten medizinischen Praxis versorgt.

**Präparatengruppe 2 (Tigecyclin und Paracetamol/Metamizol)****Tigecyclin:**

| Organsystem                                  | Sehr Häufig<br>( $\geq 1/10$ ) | Häufig<br>( $\geq 1/100$ bis $< 1/10$ )                                                      | Gelegentlich<br>( $\geq 1/1000$ bis $< 1/100$ )    | Selten<br>( $\geq 1/10.000$ bis $< 1/1000$ ) |
|----------------------------------------------|--------------------------------|----------------------------------------------------------------------------------------------|----------------------------------------------------|----------------------------------------------|
| Infektionen und parasitäre Erkrankungen      |                                | Pneumonie, Abszess, Infektionen                                                              | Sepsis/septischer Schock                           |                                              |
| Erkrankungen des Blutes und des Lymphsystems |                                | verlängerte aktivierte partielle Thromboplastinzeit (aPTT), verlängerte Prothrombinzeit (PT) | Erhöhte INR-Werte (International Normalised Ratio) |                                              |
| Stoffwechsel- und Ernährungsstörungen        |                                | Hypoglykämie                                                                                 | Hypoproteinämie                                    |                                              |
| Erkrankungen des Nervensystems               |                                | Schwindel                                                                                    |                                                    |                                              |

| Organsystem                                             | Sehr Häufig<br>(≥1/10)        | Häufig<br>(≥1/100 bis <1/10)                                                                           | Gelegentlich<br>(≥1/1000 bis <1/100)                                             | Selten<br>(≥1/10.000 bis <1/1000) |
|---------------------------------------------------------|-------------------------------|--------------------------------------------------------------------------------------------------------|----------------------------------------------------------------------------------|-----------------------------------|
| Gefäßerkrankungen                                       |                               | Phlebitis                                                                                              | Thrombophlebitis                                                                 |                                   |
| Erkrankungen des Gastrointestinaltrakts                 | Übelkeit, Erbrechen, Diarrhoe | Bauchschmerzen, Dyspepsie, Anorexie                                                                    | akute Pankreatitis                                                               |                                   |
| Leber- und Gallenerkrankungen                           |                               | erhöhte Aspartat-Aminotransferase (AST) und Alanin-Aminotransferase (ALT) im Serum, Hyperbilirubinämie | Ikterus, Leberschäden, meistens cholestatisch bedingt                            |                                   |
| Erkrankungen der Haut und des Unterhautzellgewebes      |                               | Pruritus, Ausschlag                                                                                    |                                                                                  |                                   |
| Allg. Erkrankungen und Beschwerden am Verabreichungsort |                               | Kopfschmerzen                                                                                          | Reaktionen, Entzündungen, Schmerzen, Ödeme und Phlebitis an der Injektionsstelle |                                   |
| Untersuchungen                                          |                               | erhöhte Amylase im Serum, erhöhte BUN (Blut-Harnstoff-Stickstoff)-Werte                                |                                                                                  |                                   |

Die Nebenwirkungen von Pacacetamol bzw. Metamizol siehe unter Präparatgruppe 1.

Bei ggf. auftretenden Nebenwirkungen wird der Patient vom behandelnden Prüfarzt nach Stand der Wissenschaft und der besten medizinischen Praxis versorgt.

### Präparatgruppe 3 (Cefazolin, Metronidazol und Paracetamol/Metamizol)

#### Cefazolin:

| Organsystem                                  | Häufig<br>(≥1/100 bis <1/10)                                              | Gelegentlich<br>(≥1/1000 bis <1/100)                                                            | Selten<br>(≥1/10.000 bis <1/1000)                                 | Sehr selten<br>(<1/10.000)                        |
|----------------------------------------------|---------------------------------------------------------------------------|-------------------------------------------------------------------------------------------------|-------------------------------------------------------------------|---------------------------------------------------|
| Erkrankungen des Gastrointestinaltrakts      | Diarrhoe, Übelkeit, Erbrechen, Appetitmangel, Meteorismus, Bauchschmerzen |                                                                                                 |                                                                   |                                                   |
| Erkrankungen des Immunsystems                | allergische Hautreaktionen wie Exantheme, Urtikaria und Pruritus          | Schwerwiegende Überempfindlichkeitsreaktionen wie angioneurotisches Ödem und Arzneimittelfieber |                                                                   | Lebensbedrohlicher anaphylaktischer Schock        |
| Erkrankungen des Blutes und des Lymphsystems |                                                                           | Thrombozytopenie, Neutropenie, Leukopenie, Eosinophilie, Agranulozytose, hämolytische Anämie    | plasmatische Blutgerinnungsstörungen und in deren Folge Blutungen |                                                   |
| Leber- und Gallenerkrankungen                |                                                                           | leichte, vorübergehende Erhöhung der SGOT, SGPT und der AP                                      |                                                                   | reversible Hepatitis und cholestatische Gelbsucht |
| Erkrankungen der Nieren und                  |                                                                           |                                                                                                 | Interstitielle                                                    |                                                   |

| <b>Organsystem</b>                                      | <b>Häufig</b><br>(≥1/100 bis <1/10) | <b>Gelegentlich</b><br>(≥1/1000 bis <1/100) | <b>Selten</b><br>(≥1/10.000 bis <1/1000) | <b>Sehr selten</b><br>(<1/10.000) |
|---------------------------------------------------------|-------------------------------------|---------------------------------------------|------------------------------------------|-----------------------------------|
| Harnwege                                                |                                     |                                             | Nephritis und andere Nierenerkrankungen  |                                   |
| Allg. Erkrankungen und Beschwerden am Verabreichungsort |                                     | Phlebitis, Thrombophlebitis                 |                                          |                                   |

**Metronidazol**

| <b>Organsystem</b>                                       | <b>Häufig</b><br>(≥1/100 bis <1/10) | <b>Gelegentlich</b><br>(≥1/1000 bis <1/100)                                                                                              | <b>Selten</b><br>(≥1/10.000 bis <1/1000)   | <b>Sehr selten</b><br>(<1/10.000)                                                                                        |
|----------------------------------------------------------|-------------------------------------|------------------------------------------------------------------------------------------------------------------------------------------|--------------------------------------------|--------------------------------------------------------------------------------------------------------------------------|
| Infektionen und parasitäre Erkrankungen                  |                                     |                                                                                                                                          | Candida-Superinfektionen im Genitalbereich |                                                                                                                          |
| Erkrankungen des Blutes und des Lymphsystems             |                                     | Leukopenie und Granulozytopenie, Thrombozytopenie                                                                                        |                                            | Agranulozytose und aplastische Anämie                                                                                    |
| Erkrankungen des Immunsystems                            |                                     | Leichte bis mittelschwere Überempfindlichkeitsreaktionen, wie Pruritus, Urtikaria, Erythema multiforme, Angioödem und Arzneimittelfieber |                                            | Schwere akute systemische Überempfindlichkeitsreaktionen: anaphylaktische Reaktionen bis hin zum anaphylaktischen Schock |
| Psychiatrische Erkrankungen                              |                                     | Psychotische Störungen einschl. Halluzinationen, Verwirrheitszuständen, Depression                                                       |                                            |                                                                                                                          |
| Erkrankungen des Nervensystems                           |                                     | Kopfschmerzen, Schwindel, Schläfrigkeit, Schlaflosigkeit                                                                                 |                                            | Aseptische Meningitis, Enzephalopathie, subakutes zerebellares Syndrom                                                   |
| Augenerkrankungen                                        |                                     | Sehstörungen, Doppeltsehen, Kurzsichtigkeit                                                                                              |                                            |                                                                                                                          |
| Erkrankungen des Gastrointestinaltrakts                  |                                     | Übelkeit, Erbrechen, Durchfall, Glossitis, Stomatitis, bitteres Aufstoßen, metallischer Geschmack, Magendrücken, Zungenbelag             |                                            | Pseudomembranöse Enterokolitis mit schweren und anhaltenden Durchfällen (können lebensbedrohlich sein)                   |
| Leber- und Gallenerkrankungen                            |                                     | Leberfunktionsstörungen, z. B. Erhöhung von Transaminasen und Bilirubin im Serum                                                         |                                            | Cholestatische Hepatitis, Ikterus                                                                                        |
| Skelettmuskulatur-, Bindegewebs- und Knochenerkrankungen |                                     | Myalgie, Arthralgie                                                                                                                      |                                            |                                                                                                                          |
| Erkrankungen der Nieren und Harnwege                     |                                     | dunkler Urin                                                                                                                             | Dysurie, Cystitis, Harninkontinenz         |                                                                                                                          |

| Organsystem                                             | Häufig<br>(≥1/100 bis <1/10)      | Gelegentlich<br>(≥1/1000 bis <1/100) | Selten<br>(≥1/10.000 bis <1/1000) | Sehr selten<br>(<1/10.000) |
|---------------------------------------------------------|-----------------------------------|--------------------------------------|-----------------------------------|----------------------------|
| Allg. Erkrankungen und Beschwerden am Verabreichungsort | Phlebitis bis zu Thrombophlebitis |                                      | Schwächegefühl                    |                            |

Die Nebenwirkungen von Paracetamol bzw. Metamizol siehe unter Präparategruppe 1.

Bei ggf. auftretenden Nebenwirkungen wird der Patient vom behandelnden Prüfarzt nach Stand der Wissenschaft und der besten medizinischen Praxis versorgt.

### 5.3.6 Ausweichmedikation

Ist nicht vorgesehen.

### 5.3.7 Verbotene Begleitmedikation / Überdosierung / Vorsichtsmaßnahmen

#### Präparategruppe 1 (Linezolid, Meropenem und Paracetamol bzw. Metamizol)

Andere Substanzen sollen der Lösung nicht hinzugefügt werden. Falls Linezolid zusammen mit anderen AM verabreicht wird, sollte jedes einzeln angewandt werden. Bei Verwendung desselben i.v. Zugangs zur Infusion verschiedener AM sollte der Zugang jeweils vor und nach der Anwendung von Linezolid mit einer kompatiblen Infusions-Lösung gespült werden.

In dieser Präparategruppe sollten nicht gleichzeitig verabreicht werden:

- Pseudoephedrin oder Phenylpropanolamin
- Dextromethorphan
- Rifampicin
- Warfarin
- Probenecid
- Valproinsäure
- Salicylamid
- Enzymindizierende Substanzen
- orale Antikoagulantien

#### Präparategruppe 2 (Tigecyclin und Paracetamol bzw. Metamizol)

In dieser Präparategruppe sollten nicht gleichzeitig verabreicht werden:

- Warfarin
- Chlorpromazin

#### Präparategruppe 3 (Cephazolin, Metronidazol und Paracetamol bzw. Metamizol)

In dieser Präparategruppe sollten nicht gleichzeitig verabreicht werden:

- Probenecid
- Lithium
- Barbiturate
- Phenytoin
- Cimetidin
- Fluorouracil
- Busulfan
- andere Antibiotika während des chirurgischen Eingriffs

## **6 INDIVIDUELLER STUDIENABLAUF**

### **6.1 Patientenaufklärung und -einwilligung**

Vor Aufnahme in die klinische Prüfung wird jeder Patient vom behandelnden Prüfarzt mündlich und schriftlich über Wesen, Bedeutung, Ziele, Tragweite, erwartete Vorteile und mögliche Risiken der klinischen Prüfung informiert.

Der Prüfer händigt dem Patienten während der mündlichen Aufklärung die schriftliche Patienteninformation aus. Der Patient muss ausreichend Zeit zum Lesen der Patienteninformation und die Gelegenheit haben, offene Fragen mit dem Prüfarzt zu klären. Anschließend ist dem Patienten eine angemessene Bedenkzeit vor der Einwilligung zur Teilnahme an der klinischen Prüfung zu gewähren.

Entscheidet sich der Patient für eine Teilnahme an der klinischen Prüfung, wird die Einwilligungserklärung in zweifacher Ausfertigung unterzeichnet. Ein Exemplar erhält der Patient zusammen mit der Information, das zweite Exemplar verbleibt beim Prüfer und ist im Prüfarztordner abzulegen.

Mit der Unterzeichnung der Einwilligungserklärung willigt der Patient nicht nur in die Teilnahme an der klinischen Prüfung ein, sondern genehmigt außerdem die Einsicht in seine Originalkrankenunterlagen durch den Monitor und weitere befugte Personen (Auditoren, Inspektoren). Die Einwilligung des Patienten muss sich ausdrücklich auch auf die Erhebung und Verarbeitung von Angaben über seine Gesundheit beziehen. Deshalb ist der Patient explizit über Zweck und Umfang der Erhebung und die Verwendung personenbezogener Daten, insbesondere von Gesundheitsdaten zu informieren.

#### **6.1.1 Rücknahme der Einwilligung**

Patienten können jederzeit und ohne Angabe von Gründen ihre Einwilligung zurückziehen und die Studie abbrechen. Der Patient wird in einem solchen Fall gebeten, den Abbruchgrund zu nennen, jedoch darauf hingewiesen, dass er dies nicht tun muss. Der Patient ist darüber zu informieren, dass im Falle eines Widerrufs der Einwilligung die gespeicherten Daten gemäß den Vorgaben des Arzneimittelgesetzes weiterhin verwendet werden dürfen, soweit dies erforderlich ist, um:

- Wirkungen des zu prüfenden Arzneimittels festzustellen,
- sicherzustellen, dass schutzwürdige Interessen der betroffenen Person nicht beeinträchtigt werden und
- der Pflicht zur Vorlage vollständiger Zulassungsunterlagen zu genügen.

### **6.2 Aufnahme in die Studie**

Alle Patienten, die die in Kapitel 4.1 aufgeführten Einschlusskriterien erfüllen und auf die keines der in Kapitel 4.2 genannten Ausschlusskriterien zutrifft, können in die Studie eingeschlossen werden. Darüber hinaus muss eine schriftliche Einwilligungserklärung vorliegen – zum Einwilligungsverfahren siehe 6.1.

Die Prüfung ("Screening") der Ein- und Ausschlusskriterien potentieller Studienpatienten erfolgt anhand einer vorgefertigten Checkliste. Wenn ein Patient alle Einschlusskriterien erfüllt und keine Ausschlusskriterien vorliegen, ist auf der Checkliste zu dokumentieren, ob ein Studieneinschluss erfolgt ist. Falls der Patient nicht in die Studie eingeschlossen wird, ist der Grund hierfür zu dokumentieren.

Im Rahmen der Überprüfung der Ein- und Ausschlusskriterien dokumentiert der Prüfarzt, dass der Patient aktuell nicht an einer anderen klinischen Prüfung nach AMG teilnimmt und auch in den vorangegangenen 30 Tagen nicht an einer klinischen Prüfung nach AMG teilgenommen hat. Hierfür wird die Patientenakte sorgfältig auf andere Studienteilnahmen überprüft. Es wird dem Patienten erklärt, dass der Patient nicht an einer anderen klinischen Prüfung nach AMG teilnehmen darf oder innerhalb der letzten 30 Tage an einer anderen klinischen Prüfung nach AMG teilgenommen haben darf, da eine gleichzeitige Teilnahme an mehreren Studien nah AMG unkalkulierbare Risiken für den Patienten darstellen können.

Bei Frauen im gebärfähigen Alter muss vor Studieneinschluss ein Schwangerschaftstest durchgeführt werden. Ein Studieneinschluss ist nur bei negativem Testergebnis möglich.

### **6.2.1 Nachträgliche Feststellung von Verletzungen der Ein- und Ausschlusskriterien**

Die Verletzung von Ein- und Ausschlusskriterien ist im Allgemeinen kein Grund für einen Abbruch der Studie bei dem betreffenden Patienten. Wird nachträglich festgestellt, dass zum Zeitpunkt der Rekrutierung eines Patienten bereits eine Verletzung der Ein- und Ausschlusskriterien vorlag, so wird der Studienleiter hierüber so schnell wie möglich informiert. Der Studienleiter teilt dem Prüfer umgehend mit, wie mit dem Patienten weiter zu verfahren ist. Die Dokumentation des Patienten wird weitergeführt.

## **6.3 Beschreibung des Studienablaufes**

### **Visite 1: Baseline**

Die erste Studienvisite erfolgt während des Prämedikationsgespräches zur Aufklärung über die geplante Narkose. Nach Prüfung der Ein- und Ausschlusskriterien sowie der Unterzeichnung der Einwilligung wird der Registrierungsbogen ausgefüllt und an das ZKS Leipzig-KKS gefaxt. Damit kann der Patient in der Studien-Datenbank angelegt werden. Die Patienten der adipösen Gruppe werden auf die Matching-Liste eingetragen und stehen damit für die Suche eines geeigneten nicht adipösen Kontroll-Patienten zeitnah zur Verfügung (siehe auch Kap. 8.1.3 )

Folgende präoperativen Variablen werden erfasst:

- Erhebung der Demographischen Daten (Alter, Geschlecht,)
- Erhebung der Anamnese (Körpergröße, Gewicht, Berechnung des BMI)
- Dokumentation der Begleiterkrankungen
- Dauereinnahme von Medikamenten (Art, Dosis)
- Einnahme von Antibiotika in den letzten 3 Monaten; (wenn ja, Indikation, Art, Dosierung, Dauer der Einnahme)
- Erhebung der Laborparameter:
  - Blutbild einschließlich: RBC, Leukozyten, Hb, MCV, MCH, MCHC, Hämatokrit, Thrombozyten.
  - Klinische Chemie: Gesamtbilirubin, Alkalische Phosphatase (AP), Aspartataminotransferase (ASAT) Alaninaminotransferase (ALAT), Gamma-Glutamyltranspeptidase (gGT), Lactatdehydrogenase (LDH), Kreatinin, Harnstoff, Elektrolyte im Serum (Natrium, Calcium, Kalium, Phosphat Chlorid), C-reaktives Protein (CRP), Procalcitonin, Gesamtprotein, Albumin

- Coagulation test: Quick, aPTT (Partial thromboplastin time), Fibrinogen, Fibrinmonomer
- Art des geplanten chirurgischen Eingriffs

## Visite 2: Tag des operativen Eingriffs

Die Zuteilung der Patienten erfolgt zunächst in die Präparategruppe 1 (600 mg Linezolid und 1000 mg Meropenem), nach Erreichen des Rekrutierungsziels in die Präparategruppe 2 (100 mg Tigecyclin) und anschließend in die Präparategruppe 3 (2000 mg Cefazolin und 500 mg Metronidazol). Innerhalb der jeweiligen Präparategruppe erhält die erste Hälfte der eingeschlossenen Patienten als Analgetikum 1000 mg Paracetamol, die zweite Hälfte 1000 mg Metamizol.

### Probenentnahmeplan für die Mikroanalyse und Plasma:

#### Präoperativ (ca. 1 Stunde vor Narkoseeinleitung):

- Platzierung von zwei Mikrodialysesonden und Äquilibration

(Die Haut an der Punktionstelle der  $\mu$ D-Sonde wird gereinigt und desinfiziert. Die  $\mu$ D-Sonde wird an einer geeigneten Stelle am Oberarm oder Oberschenkel in das subkutane Bindegewebe injiziert.)

|        | Zeit                                         |                         | Zeit          |                 |
|--------|----------------------------------------------|-------------------------|---------------|-----------------|
|        | - 1 h - 0                                    |                         | - 1 h - 0 min | Äquilibration   |
| Plasma | -                                            | Medikamentenapplikation | 0 - 30 min    | Mikrodialysate  |
|        | 30 min (direkt nach Medikamentenapplikation) |                         | 30 - 60 min   |                 |
|        | 1 h                                          |                         | 60 - 90 min   |                 |
|        | -                                            |                         | 90 - 120 min  |                 |
|        | 2 h                                          |                         | 2 - 3 h       |                 |
|        | 3 h                                          |                         | 3 - 4 h       |                 |
|        | 4 h                                          |                         | 4 - 5 h       |                 |
|        | 5 h                                          |                         | 5 - 6 h       |                 |
|        | 6 h                                          |                         | 6 - 7 h       |                 |
|        | 8 h                                          |                         | 7 - 8 h       |                 |
|        |                                              |                         | 0 - 30 min    | Retro-dialysate |
|        |                                              |                         | 30 - 60 min   |                 |

### Einleitung der Allgemeinanästhesie

- ~~Platzierung von zwei Mikrodialysesonden und Äquilibration~~

~~(Die Haut an der Punktionstelle der  $\mu$ D-Sonde wird gereinigt und desinfiziert. Die  $\mu$ D-Sonde wird an einer geeigneten Stelle am Oberschenkel in das subkutane Bindegewebe injiziert.)~~

- Intravenöse Medikamentenapplikation - **zunächst das Antibiotikum und danach das Analgetikum entsprechend der Präparategruppe (siehe Kap. 5.3.1)**
- Probenentnahmen/Messungen nach dem oben aufgeführten Probenentnahmeplan  
(Entnahme von Plasma und Microdialysaten für pharmakokinetische Untersuchungen. Der Gesamtblutverlust während der Studie beträgt ca. 50 ml. Die Blutproben werden nach der Gewinnung auf Eis gelagert und nach 1 h zentrifugiert. Plasma und Dialysate werden bei -20 °C eingefroren. Die weitere Lagerung der Proben bis zur Analyse erfolgt bei -80°C; der Versand an das Institut für klinische Chemie und Pharmakologie, Universität Regensburg im Trockeneis.
- Entnahme vom Fettgewebe während des chirurgischen Eingriffs. Die entnommenen Proben (0.5-1 g) werden von oberflächlichem Blut und Flüssigkeit abgetupft und in einem Plastikgefäß bei -20 °C eingefroren. Die weitere Lagerung der Proben bis zur Analyse erfolgt bei -80°C; der Versand an das Institut für klinische Chemie und Pharmakologie, Universität Regensburg im Trockeneis.
- in-vivo Kalibrierung der Mikrodialysesonden nach Retrodialyse-Methode: die Zielsubstanz wird dem Perfusat in einer genau definierten Konzentration beigemengt, und die Diffusionsrate durch die Membran *in vivo* bestimmt (30 min Anlauf; 2x30min Probenannahme).
- Entfernung der Mikrodialysesonden
- Erfassung von unerwünschten Ereignissen bzw. Nebenwirkungen im Zusammenhang mit der Durchführung von perioperativen antibiotischen Therapie und Analgesie mit peripher wirkenden Analgetika

### Visite 3 bis Visite 9

**(tägliche Visite vom 1. bis zum 7. postoperativen Tag bzw. bis zur Entlassung aus dem Krankenhaus)**

- Bewertung der postoperativen Schmerzen (NRS Scale)
- Dokumentation der Wundinfektionen und deren Lokalisation/Ausprägung nach dem chirurgischen Eingriff
- Dokumentation der Gabe von Schmerzmitteln und Antibiotika
- Dokumentation der Nebenwirkungen/Unerwünschten Ereignisse innerhalb der ersten 72 Stunden nach Applikation

## 6.4 Vorzeitiger Abbruch der Studientherapie oder der Nachbeobachtung

Jeder Abbruch der Studientherapie oder der Nachbeobachtung wird unter Angabe von Datum und Zeitpunkt sowie nach Möglichkeit unter Angabe der Umstände und Gründe dokumentiert und dem KKS-Datenmanagement sowie dem Studienleiter gemeldet.

### 6.4.1 Abbruch der Studientherapie für einzelne Patienten

Studienabbrüche sollten generell vermieden werden. Das Abbrechen der Studie ist nur bei Rückzug der Einwilligungserklärung möglich. Protokollverletzungen führen nicht zum Abbruch der Studie für den individuellen Patienten. Der Abbruch der Prüftherapie stellt ebenfalls kein Kriterium für einen

Studienabbruch dar. Dauerhafter Abbruch der Studientherapie erfolgt, wenn der Patient die Einwilligung zurückzieht.

Bei Studienabbruch müssen die Gründe/Umstände sowie der letzte klinische Status dokumentiert werden. Erfolgt kein Abbruch der Studienteilnahme, so muss die Nachbeobachtung planmäßig weitergeführt werden (Ausnahme: Patient zieht seine Einwilligung zurück).

## **6.5 Plan zur Weiterbehandlung**

Eine spezifische Nachbetreuung ist nicht vorgesehen.

Bei der Studienintervention handelt es sich um eine prophylaktische Maßnahme zur Verhinderung von Wundinfektionen, die für die anschließende medizinische Betreuung keine Konsequenzen hat

Nach gegenwärtigem Erkenntnisstand gibt es keinen Anhalt für das Auftreten von Spätfolgen nach einer Therapie mit der Prüfmedikation. Im Falle des Auftretens unerwünschter Nebenwirkungen werden die Patienten angewiesen, sich gemäß §7 Abs. 2 Ziffer 13 GCP-Verordnung an den Studienleiter oder einen seiner Vertreter zu wenden.

# **7 UNERWÜNSCHTE EREIGNISSE (AE/SAE)**

## **7.1 Unerwünschtes Ereignis (AE)**

### **7.1.1 Definition**

Unerwünschte Ereignisse sind alle ungünstigen medizinischen Vorkommnisse bei einem Patienten bzw. Probanden der klinischen Forschung, bei dem ein Arzneimittel oder Medizinprodukt angewandt wird, wobei das Ereignis nicht notwendig in kausaler Beziehung zu dieser Behandlung stehen muss. (ICH-Richtlinie E2A)

Dazu zählen Erkrankungen, Krankheitszeichen (auch pathologische Laborbefunde) und Symptome, die nach der Aufnahme des Patienten in die Studie (i. d. R. nach Therapiebeginn) neu auftreten oder sich verschlechtern.

### **7.1.2 Dokumentation und Meldung**

Die AE- und SAE-Dokumentation erfolgt im Gegensatz zu den Datenerfassungen in Englisch. Ab dem Zeitpunkt der Gabe der Prüfpräparate bis 72 Stunden nach Gabe der Prüfpräparate werden alle AE im CRF und in der Patientenakte zusammen mit der eventuell angewendeten Begleitmedikation dokumentiert. Hierbei werden die Diagnose, Beginn und Ende der AE, Schweregrad, möglicher kausaler Zusammenhang mit der Prüfmedikation und Ausgang des Ereignisses dokumentiert. Der Prüfarzt verfolgt den Verlauf des Ereignisses, bis das AE beendet oder der Patient stabilisiert ist.

AE werden nur für die Zeit der Applikation der Prüfpräparate und den darauf folgenden 72 Stunden erfasst, da die Prüfmedikation einmalig verabreicht wird und ein späteres Auftreten von AE in keinem Zusammenhang zu der Prüfmedikation steht.

## 7.2 Sicherheitsanalysen

Jeder Patient wird hinsichtlich der Sicherheit im Studienverlauf engmaschig überwacht. Dies beinhaltet zu jeder Visite neben der Erfassung von unerwünschten Ereignissen die Erhebung folgender Parameter:

- Postoperative Schmerzen
- Auftreten neuer Wundinfektionen

## 7.3 Begleiterkrankungen

Begleiterkrankungen werden zu Beginn der Studie dokumentiert und im Rahmen der Studienuntersuchungen evaluiert. Es wird keine Verschlechterung von Begleiterkrankungen durch die Studientherapie erwartet. Sollte dies dennoch auftreten, oder eine neue Begleiterkrankung während der Studienteilnahme diagnostiziert werden, muss der behandelnde Prüfarzt dies als AE dokumentieren.

## 7.4 Schwerwiegendes unerwünschtes Ereignis (SAE)

### 7.4.1 Definition

Unerwünschte Ereignisse werden als schwerwiegend definiert (Def. nach ICH-Richtlinie E2A, Abschnitt IIB), wenn sie:

- **zum Tod geführt haben,**
- **lebensbedrohlich sind,**

Hinweis: Der Begriff lebensbedrohlich bezieht sich in der Definition als schwerwiegend auf ein Ereignis, in welchem der Patient zum Zeitpunkt des Auftretens des Ereignisses in einer lebensbedrohlichen Situation war; es bezieht sich nicht auf Ereignisse, welche hypothetisch lebensbedrohlich gewesen wären, wenn das Ereignis ernsthafter gewesen wäre.

- **einer stationären ärztlichen Behandlung bedürfen oder die Verlängerung eines bestehenden stationären Aufenthaltes erfordern,**
- **zu bleibenden Schäden führen, oder eine angeborene Missbildung bzw. einen Geburtsfehler darstellen.**

Die im Folgenden aufgeführten potenziellen unerwünschten Ereignisse bis einschließlich Tod des Patienten sind zugleich mögliche Symptome oder Folgen der zugrunde liegenden Erkrankung/des geplanten operativen Eingriffs bei den an dieser Studie teilnehmenden Patienten. Sie sind daher von der Meldung als SAE ausgenommen und werden nur als AE dokumentiert.

In dieser klinischen Prüfung kommt es durch die Allgemeinanästhesie mit Gabe von kreislauf-depressiven Medikamenten und der Notwendigkeit der invasiven Beatmung aber auch durch den geplanten chirurgischen Eingriff häufig zu studienunabhängigen kardiozirkulatorischen und respiratorischen klinischen Ereignissen. Diese werden durch die studienbedingte Dokumentation erfasst und diese Daten gehen in die Sicherheitsanalysen ein. Eine **Erfassung und Meldung** dieser klinischen Ergebnisse **als SAE erfolgt nur**, wenn der Prüfer einen **Zusammenhang mit der Gabe der Prüfpräparate bzw. der Mikrodialysetechnik** vermutet. Diese Regelung betrifft folgende klinischen Ereignisse:

- Tod verursacht durch operative oder anästhesiologische Komplikationen

- Kardiovaskuläre Ereignisse: notwendige Gabe vasoaktiver Substanzen oder Hypotension
- Respiratorische Ereignisse: Abfall der Sauerstoffsättigung trotz FiO<sub>2</sub> 1.0, Aggravierung der mechanischen Beatmung

#### 7.4.2 Dokumentations- und Meldepflichten PRÜFER

Schwerwiegende unerwünschte Ereignisse werden papierbasiert auf SAE-Bögen dokumentiert und müssen durch den Prüfer unverzüglich an den Sponsor gemeldet werden. Sind zu einem späteren Zeitpunkt weitere Informationen zu dem SAE vorhanden, so müssen diese ebenfalls unverzüglich an den Sponsor gemeldet werden.

Alle SAE die im Zeitraum von 72 Stunden nach der Gabe der Prüfmedikamente eines jeden Patienten auftreten, müssen dokumentiert werden.

Im Fall des Todes einer betroffenen Person aufgrund der Gabe der Prüfpräparate bzw. der Mikrodialysetechnik übermittelt der Prüfer der zuständigen Ethik-Kommission, der zuständigen Bundesoberbehörde sowie dem Sponsor alle für die Erfüllung ihrer Aufgaben erforderlichen zusätzlichen Auskünfte **auf Anfrage**.

Bei allen Meldungen sind personenbezogene Daten vor ihrer Übermittlung unter Verwendung des Identifizierungscodes der betroffenen Person zu pseudonymisieren. Die Primärmeldung und alle Folgemeldungen müssen mittels Patienten-Identifikationsnummer einander zugeordnet werden können.

Das Auftreten jedes schwerwiegenden Unerwünschten Ereignisses (SAE, inkl. Todesfall, auch ohne Kausalzusammenhang mit Einnahme des Prüfpräparates unter Berücksichtigung der o. g. Einschränkungen) muss unverzüglich nach bekannt werden durch den Prüfer an die unten genannte Adresse gemeldet werden:

**ZKS Leipzig – KKS / Arzneimittelsicherheit**

Universität Leipzig  
Zentrum für Klinische Studien Leipzig – KKS  
Härtelstr. 16-18, 04107 Leipzig

Tel.: +49 / 341 / 97-16129

**E-mail: [pharmacovigilance@zks.uni-leipzig.de](mailto:pharmacovigilance@zks.uni-leipzig.de)**

**Fax: 0341 / 97-16278**

#### 7.4.3 Dokumentations- und Meldepflichten SPONSOR

Nach Eingang des SAE im KKS erfolgt die unverzügliche Weiterleitung des SAE an den Leiter der Klinischen Prüfung bzw. dessen Vertretung zur medizinischen Zweitbewertung des SAE.

Am ZKS Leipzig - KKS erfolgen die unverzügliche Dateneingabe des SAEs sowie die Kodierung mit MedDRA.

Danach erfolgt eine gesetzliche Weiterleitung entsprechend der im Kapitel 7.6 beschriebenen Verfahrensweisen ausschließlich für SUSARs.

Die detaillierten Dokumentations- und Meldepflichten des Sponsors werden in einem gesonderten, studienspezifischen Pharmakovigilanz-Plan dargestellt, welcher parallel zum Prüfplan erstellt und finalisiert wird.

## 7.5 Periodische Berichte

### 7.5.1 Annual Safety Report (ASR)

Der Sponsor erstellt einmal jährlich **und zusätzlich** auf Anfrage einen Sicherheitsbericht (Annual Safety Report, ASR<sup>1</sup>)(gem. Detailed guidance on the collection, verification and presentation of adverse reaction reports arising from clinical trials on medicinal products for human use). Dieser Sicherheitsbericht umfasst eine ausführliche Risiko-Nutzen-Analyse, eine Liste aller im Rahmen der klinischen Prüfung dokumentierten SARs – Schwerwiegende Arzneimittelnebenwirkungen (siehe unten) und eine tabellarische Zusammenfassung aller im Rahmen der klinischen Prüfung dokumentierten SARs. Der Sponsor sendet den Bericht über die Sicherheit der getesteten Prüfpräparate an die federführende Ethikkommission und die Bundesoberbehörde.

Bis zum Zeitpunkt der Erstellung des jährlichen Sicherheitsberichtes müssen alle SAEs, auch diejenigen, die nicht unverzüglich zu melden sind (erwartete SAR und krankheitsbezogene SAE), beim Sponsor vorliegen.

Stichtag für die Erstellung ist das Datum der ersten Genehmigung der klinischen Prüfung durch die Bundesoberbehörde. Alle bis zu diesem Zeitpunkt aufgetretenen/erhobenen Daten werden in den ASR aufgenommen. Ab diesem Stichtag beginnt die 60-Tage-Frist bis zur Einreichung des ASR.

Der ASR wird durch den Leiter der klinischen Prüfung in Zusammenarbeit mit dem Projektmanager am KKS und dem zuständigen Biometriker erstellt.

## 7.6 Verdacht unerwarteter schwerwiegender Arzneimittelnebenwirkung (SUSAR)

### 7.6.1 Definition

Unerwartete schwerwiegende Arzneimittelnebenwirkungen (SUSAR – Suspected Unexpected Serious Adverse Reaction) sind Nebenwirkungen (stehen in sicherem bzw. möglichen Zusammenhang mit der Einnahme des Prüfpräparates), die nach Art oder Schweregrad nicht mit der vorliegenden Information über das Prüfpräparat übereinstimmen.

Informationen zum Prüfprodukt entsprechen der Fachinformation (SmPC – Summary of Product Characteristics)/Packungsbeilage.

### 7.6.2 Dokumentation und Meldepflichten.

#### Informationen für SPONSOR

Der Sponsor übermittelt alle ihm zur Verfügung stehenden Informationen zu SUSARs unverzüglich, spätestens jedoch innerhalb von 15 Kalendertagen nach Bekannt werden an die zuständige Ethikkommission, die zuständige Bundesoberbehörde und alle an der Studie beteiligten Hauptprüfer.

Bei jeder SUSAR, die zu einem Todesfall geführt hat oder bei der Lebensgefahr bestand, übermittelt die Studienleitung/der Sponsor der zuständigen Ethikkommission, der Bundesoberbehörde und allen beteiligten Hauptprüfern die zur Bewertung notwendigen Informationen unverzüglich, spätestens

---

<sup>1</sup> Siehe "Detailed guidance on the collection, verification and presentation of adverse reaction reports arising from clinical trials on medicinal products for human use").

jedoch sieben Kalendertage nach Bekannt werden, und innerhalb der nächsten acht Kalendertage weitere relevante Informationen.

Die detaillierten Dokumentations- und Meldepflichten des Sponsors werden in einem gesonderten, studienspezifischen Pharmakovigilanz-Plan dargestellt, welcher parallel zum Prüfplan erstellt und finalisiert wird.

### **Informationen für PRÜFER**

Der Hauptprüfer eines Zentrums leitet die ihm übermittelten Informationen über das Auftreten eines SUSARs an alle beteiligten Prüfer seines Zentrums weiter und legt die Information im Prüfarztordner ab. Diese bestätigen den Erhalt dieser Informationen durch Unterschreiben einer Unterschriftenliste.

## **7.7 Therapeutische Maßnahmen**

Bedarf der Patient aufgrund des unerwünschten Ereignisses einer Behandlung, so muss diese nach dem derzeitigen Stand der medizinischen Forschung durchgeführt werden, um die Gesundheit des Patienten wieder herzustellen. Geeignete Geräte und Präparate zur Wiederbelebung müssen verfügbar sein, um den Patienten im Notfall schnellstmöglich behandeln zu können.

Die ergriffenen Maßnahmen bezüglich der Behandlung des AE/SAE müssen vom Prüfarzt entweder an der entsprechende Stelle im CRF und/oder durch zusätzliche Unterlagen dokumentiert werden.

## **7.8 Umgang mit Schwangerschaften**

Bei Frauen im gebärfähigen Alter muss vor Studieneinschluss ein Schwangerschaftstest durchgeführt werden. Ein Studieneinschluss ist nur bei negativem Testergebnis möglich.

Durch das akutmedizinische und intensivmedizinische Setting in Verbindung mit dem operativen Eingriff ist eine sexuelle Abstinenz während der Behandlung mit der Prüfmedikation am Tag der Operation gegeben.

# **8 BIOMETRIE**

## **8.1 Biometrische Aspekte des Studiendesigns**

Bei der vorliegenden Studie handelt es sich um eine prospektive, offene, monozentrische Untersuchung von adipösen und nicht adipösen Patienten, die einer perioperativen antibiotischen und analgetischen Therapie bedürfen. Es werden drei Präparategruppen zunächst getrennt voneinander untersucht, jeweils mit einem nicht adipösen und einem adipösen Arm im Verhältnis 1:1.

### **8.1.1 Primärer Endpunkt**

- Die Fläche unter der Konzentrations-Zeit-Kurve ( $AUC_{0-8}$ ) für jedes der untersuchten Medikamente in der interstitiellen Flüssigkeit aus einer der Präparategruppen

### 8.1.2 Sekundäre Endpunkte

Alle unten genannten Konzentrationen werden sowohl in der interstitiellen Flüssigkeit als im Plasma untersucht (wenn nicht anders vermerkt)

- Fläche unter der Konzentrations-Zeit-Kurve ( $AUC_{0-8}$ ) für Plasma
- maximale Konzentrationen ( $C_{max}$ )
- $C_{max}/MIC$  ( $MIC$  = minimal inhibitory concentration)
- Zeit bei der  $MIC$  überschritten wird
- Konzentration zum Zeitpunkt des Zunähens
- $AUC_{tissue}/AUC_{plasma}$  Verhältnis
- PK/PD-Parameter (Pharmakokinetik/Pharmakodynamik)
- Halbwertszeiten ( $t_{1/2}$ )
- Konzentrationen der Zielsubstanzen im chirurgisch entnommenen Gewebe
- die Inzidenz von Wundinfektionen
- postoperatives Schmerzscoring
- Einnahme von Analgetika nach der Operation
- Krankenhausaufenthaltsdauer

### 8.1.3 Wahl der Kontrollgruppe

Es wird eine Liste mit Patienten der adipösen Gruppe geführt. Sobald die Liste mindestens einen Eintrag enthält wird ständig nach einem nicht adipösen „matching“ Partner gesucht. Dieser Partner muss dasselbe Geschlecht haben und maximal 5 Jahre älter bzw. maximal 5 Jahre jünger sein. Sobald ein entsprechender Partner gefunden wird, wird der dazugehörige adipöse Patient aus der Liste entfernt.

## 8.2 Statistische Formulierung der Studienfrage

### 8.2.1 Statistische Formulierung des Primären Endpunkts

$H_0$ : Der lineare Korrelationskoeffizient zwischen  $AUC_{0-8}$  und Gewicht ist Null

$H_A$ : Der lineare Korrelationskoeffizient zwischen  $AUC_{0-8}$  und Gewicht ist ungleich Null

### 8.2.2 Statistische Formulierung weiterer Endpunkte

Zurzeit wird eine Standarddosis prophylaktischer Antibiotika vor einer Operation verabreicht und der primäre Endpunkt soll zeigen, dass dies zu deutlich verschiedene Mengen Wirkstoff im Gewebe führt. Es ist darüber hinaus von großem Interesse zu wissen inwiefern das viele Fett von adipösen Patienten und nicht bloß ihr hohes Gewicht einen Einfluss hat. Dies soll bei vielen der gemessenen Parameter anhand von Modellen untersucht werden, die sowohl Gewicht als auch BMI beinhalten. Der zusätzliche Informationsgewinn von BMI in einem genesteten Modell wird anhand eines F-Tests untersucht. Weitere Parameter, die im Modell berücksichtigt werden, sind z.B. Geschlecht und Alter.

### 8.3 Fallzahldiskussion

Die Fallzahlplanung basiert auf Ergebnissen aus [7, 24], die zeigen, dass die Fettgewebskonzentration von Antibiotika im wesentlichen mit Gewicht linear zusammenhängt. Im übrigen ist dies für die Plasmakonzentrationen nicht der Fall, die eine deutlich schwächere Gewichtsabhängigkeit zeigen.

Wir gehen von einem Grundwert für die AUC von  $3 \text{ mg} \times \text{h/L}$  aus, mit einer Standardabweichung von  $2 \text{ mg h/L}$  für einen 60 kg Patient [7], aber betonen, dass nur das Verhältnis dieser zwei Zahlen eine Rolle spielt. Unter den Annahmen, dass die AUC log-normal-verteilt ist und dass Gewicht in den jeweiligen Gruppen normalverteilt mit Mittelwert 60 bzw. 120 kg und Standardabweichungen von 9 bzw. 22 kg ist, so ergibt eine Simulation der Daten mit 10000 Wiederholungen, dass 13 Patienten pro Gruppe (und Medikation) notwendig sind, um eine Power von 80% zu erreichen bei einem Signifikanzniveau von 5%. Die Simulation zeigt ferner, dass ein Korrelationskoeffizient von 0.5 ist zu erwarten (95% Konfidenzintervall 0.2-0.8).

Mit einer konservativ geschätzten Drop-out-Rate von 15% müssen 15 Patienten pro Arm pro Medikament eingeschlossen werden, wobei mindestens 13 auswertbare Patienten pro Präparategruppe und Arm vorliegen müssen.

### 8.4 Verfahren zur Datenanalyse

#### 8.4.1 Analysepopulationen

Alle Patienten, von denen die ersten 4 Werte aus den Mikrodialyseproben vorliegen und bei denen nicht mehr als 3 Werte insgesamt fehlen, werden in die Analysepopulation aufgenommen.

#### 8.4.2 Geplante Analysemethoden

Für den primären Endpunkt wird das Konfidenzintervall für den Korrelationskoeffizienten mit Fishers Z-Transformation ausgerechnet.

Andere Endpunkte werden mit (multiplen) Regressionsanalysen untersucht und die Rate der Wundinfektionen mit dem exakten Fisher-Test.

Abgeleitete Größen aus der Mikrodialyse wie z.B. die maximale Konzentration  $C_{\max}$  oder die Halbwertszeit  $t_{1/2}$  können vergleichsweise durch ein Bayessches hierarchisches Modell ermittelt werden unter der Annahme, dass die Konzentration im Laufe der Zeit exponentiell abfällt nach Erreichen des Maximums.

### 8.5 Zwischenauswertungen

Es sind keine Zwischenauswertungen vorgesehen.

### 8.6 Endauswertung

Nach Einschluss aller Patienten einer Präparategruppe sowie der vollständigen Dokumentation der Ergebnisse einschließlich der Bereinigung der erhobenen Daten erfolgt die Analyse der Endpunkte zu den Medikamenten dieser Präparategruppe.

Eine post-hoc Poweranalyse kann benutzt werden, um gegebenenfalls die Fallzahl für die nächsten zu untersuchenden Medikamenten der folgenden Präparategruppen zu korrigieren.

Nach Einschluss aller Patienten in die drei Präparategruppen sowie der vollständigen Dokumentation der Ergebnisse einschließlich der Bereinigung aller erhobenen Daten, werden alle Daten gemeinsam ausgewertet. Dabei werden die drei Präparategruppen als Faktoren in der Analyse behandelt.

## **9 ETHISCHE UND REGULATORISCHE VORGABEN**

### **9.1 GCP-Erklärung**

Alle an Studie Beteiligten (Sponsor, Bevollmächtigte und Auftragnehmer des Sponsors, Prüfer etc.) verpflichten sich die klinische Prüfung nach den Vorgaben der nationalen Gesetze, den Anforderungen der ICH Guideline for Good Clinical Practice (GCP) E6 vom Juni 1996 und der CPMP/ICH/135/95 vom September 1997 durchzuführen und die Empfehlungen der Deklaration von Helsinki (Version Somerset West 1996) zu beachten.

### **9.2 Antragstellung**

#### **9.2.1 Antragstellung bei Ethikkommission und Bundesoberbehörde**

Vor Einreichung der Studienunterlagen bei der federführenden Ethikkommission (EK) bzw. der zuständigen Bundesoberbehörde (BOB) ist der Sponsor verpflichtet, die Studie in die Europäische Datenbank für Klinische Studien (EudraCT) einzugeben.

Danach werden der vorliegende Prüfplan und alle weiteren Unterlagen gemäß GCP-V §7 der zuständigen, federführenden Ethikkommission mit der Bitte um eine Bewertung vorgelegt.

Zeitgleich mit der Antragstellung bei der federführenden EK werden alle beteiligten Ethikkommissionen über die Antragstellung informiert, erhalten die Antragsunterlagen in Kopie und die Dokumente zur Qualifikation der Prüfer und der Prüfzentren, welche sie bzgl. ihrer Eignung zu bewerten haben. Parallel dazu erfolgt die Antragstellung bei der Bundesoberbehörde (BfArM) entsprechend den Anforderungen der GCP-V §7.

Die Studie kann erst nach zustimmender Bewertung durch die federführende Ethikkommission und nach Genehmigung durch die Bundesoberbehörde beginnen. Die schriftliche Bestätigung der positiven Bewertung der Studie wird im Trial Master File abgelegt. Weiterhin erhält jedes teilnehmende Zentrum eine Kopie der Bewertung/Genehmigung, die im Prüfartzordner abgelegt wird.

### **9.3 Nachträgliche Prüfplanänderungen**

Änderungen der von der zuständigen Bundesoberbehörde genehmigten und von der Ethik-Kommission zustimmend bewerteten klinischen Prüfung, die geeignet sind,

- sich auf die Sicherheit der betroffenen Personen auszuwirken, z.B. essentielle Änderungen im Therapieregime
- mit zusätzlichen Datenerhebungen oder Auswertungen einhergehen, welche eine Änderung der Patientenaufklärung und/oder -einwilligung erfordern

- die Auslegung der wissenschaftlichen Dokumente, auf die die Prüfung gestützt wurde, oder die wissenschaftliche Aussagekraft der Studienergebnisse beeinflussen,
- die Art der Leitung oder Durchführung der Studie wesentlich verändern,
- die Qualität oder Unbedenklichkeit der Prüfpräparate beeinträchtigen

dürfen nur vorgenommen werden, wenn diese Änderungen von der Ethik-Kommission zustimmend bewertet und von der zuständigen Bundesoberbehörde genehmigt wurden.

Gemäß GCP-V§10 sind bei Prüfplanänderungen die federführende Ethikkommission und die Bundesoberbehörde zu informieren, ggf. ist eine erneute Bewertung/Genehmigung einzuholen. Die Änderungen dürfen nicht vor der Entscheidung der Ethik-kommission/Bundesoberbehörde umgesetzt werden.

## 10 DOKUMENTATION

### 10.1 Prüfbögen (Case Report Forms - CRF)

Quelldaten (source data) im Sinne der ICH-Richtlinie E6 sind alle routinemäßig erhobenen Daten und Laborberichte sowie spezielle CRFs für die Dokumentation der Studie.

Der überwiegende Anteil der zu erfassenden Daten wird routinemäßig bei Patienten während des operativen Eingriffes erhoben und direkt in die reguläre Patientenakte eingetragen. Die studienrelevanten Daten werden per RDE (Remote Data Entry – Elektronische Dateneingabe) erfasst. Dazu werden die Daten vom Prüfarzt oder einem autorisierten Studienassistenten an einem online geschalteten Arbeitsplatzrechner in spezielle Masken eingegeben, die ein elektronisches CRF darstellen. Über das elektronische CRF werden die Daten direkt in die Studiendatenbank der Studienzentrale im Zentrum für Klinische Studien Leipzig - KKS übernommen.

### 10.2 Datenmanagement

Das Datenmanagement erfolgt unter Verwendung des Studienmanagement-Tools eResearch Network. Für die Erstellung der Studiendatenbank wird vom verantwortlichen Projektmanager in Zusammenarbeit mit dem Biometriker und Dokumentar ein Pflichtenheft formuliert, das dem Datenbankprogrammierer als Basis für die Erstellung der Datenbankanwendung (der elektronischen CRFs) dient.

Die CRFs werden mittels „eResearch eDatamanagement“ modelliert. Dieses Modul erzeugt in einem Oracle-DBMS eine Datenbank, in der die Daten aus dem CRF übertragen werden. Dies geschieht mittels einer Maske, die mit dem „eResearch Screen Modeller“ erzeugt wurde. Für die Eingabe der Daten im Prüfzentrum werden der Browser Internet Explorer ab Version 6.0 und eine Internetverbindung (Standleitung oder Wählverbindung) benötigt. Die elektronischen CRFs werden dann vom Server des KKS abgerufen (über den Internet Explorer).

Die Authentifizierung des Benutzers erfolgt über Logins und Passwörter, damit entspricht diese RDE-Software auch den Forderungen von ICH-GCP und der FDA. Die Datenverbindung zwischen Client-Rechner und Server im KKS ist verschlüsselt (HTTPS). Der Server befindet sich physisch in einem gesicherten Raum und elektronisch hinter einer zweistufigen Firewall im Netz des Zentrums für Klinische Studien – KKS Serverdaten werden mehrmals täglich gesichert. Die Sicherungsmedien

werden in einem separaten, verschließbaren Raum gelagert, zu dem nur der Systemadministrator Zutritt hat. Durch den Einsatz eines hierarchischen, auf Rollen basierenden Zugriffskonzeptes ist ein unberechtigter Zugriff auf die Patientendaten unmöglich. Die Anonymität der Daten im Rahmen von Auswertungen ist sichergestellt.

Das ZKS Leipzig – KKS hat Einsicht in die vom Prüfzentrum eingegebenen Daten im elektronischen CRF. Diese Daten liegen für jeden Patienten pseudonymisiert vor. Die Zuordnung zwischen Patient und Patienten-ID erfolgt im jeweiligen Studienzentrum durch die Patientenidentifikationsliste und wird nicht in der Datenbank abgespeichert.

Bei der Eingabe im Zentrum werden die Daten erstmals auf Plausibilität geprüft. Fehlende bzw. offensichtlich falsche Werte lösen sofortige Fehlermeldungen aus, die Änderungen bzw. eine Erklärung durch die eingebende Person fordern. Eine weitere Plausibilitäts- und Konsistenzüberprüfung erfolgt dann im Dokumentationszentrum. Daten, zu denen Rückfragen erforderlich sind, können in der entsprechenden Eingabemaske des CRFs gekennzeichnet und online beantwortet werden. Notwendige Änderungen an den Daten dürfen und können nur durch den autorisierten Prüfarzt oder Studienassistenten durchgeführt werden, der die Ersteingabe durchgeführt hat. Während der Änderung wird ein sogenannter Audit-Trail erstellt, mit dessen Hilfe der Ablauf der Änderung verfolgt werden kann.

Nach Abschluss der Datenübernahme in die Datenbank und dem Eingang aller angeforderten Änderungen in den CRFs findet eine komplexe Plausibilitätsprüfung statt, deren erfolgreicher Abschluss das Schließen der Datenbank erlaubt. Die Durchführung dieser komplexen Plausibilitätsprüfung zum Abschluss der Datenerfassung wird durch Working Instructions geregelt.

### **10.3 Archivierung**

Alle relevanten Studienunterlagen (Trial Master File), die elektronisch erfassten Daten, die Originale aller CRFs und der Abschlussbericht werden 10 Jahre nach Abschluss der Studie im ZKS Leipzig - KKS aufbewahrt.

In den Prüfzentren werden der Prüfarztordner, die Patientenidentifikationsliste, die unterschriebenen Einwilligungserklärungen und die Patientenakten 10 Jahre nach Abschluss der Studie aufbewahrt. Verlangen hausinterne Regelungen oder andere Gesetzgebungen (z.B. Röntgenverordnung, Strahlenschutzgesetz) eine längere Aufbewahrungsfrist, so ist diese zu berücksichtigen.

## **11 ÜBERWACHUNG DER KLINISCHEN PRÜFUNG**

### **11.1 Zugang zu Quelldaten**

Aufgrund gesetzlicher Regelungen zur Sicherung der Datenqualität und zur Überwachung der Studiendurchführung am Zentrum sind die Prüfarzte verpflichtet, autorisierten Dritten Einsicht in die Patientenakten (Quelldaten) zu gewährleisten. Dazu zählen Monitore, Auditoren und weitere Beauftragte des Auftraggebers, Mitarbeiter der zuständigen Überwachungsbehörde oder der Bundesoberbehörde. Diese Personen sind zur Verschwiegenheit verpflichtet.

## 11.2 Monitoring

Zur Überwachung der Studienzentren ist im Rahmen der Studie ein On-site Monitoring durch Mitarbeiter des ZKS Leipzig – KKS oder dessen Beauftragte geplant.

Hinsichtlich der Monitoring-Strategie (Frequenz/Umfang) wird nach entsprechender Analyse gemäß den Vorgaben der Risikoanalyse ein risikoadaptiertes Monitoring der Klasse K2 durchgeführt.

Während des Initiierungsbesuches im Prüfzentrum erfolgt eine Einführung zum Studienablauf, ISF, Logistik, SAE-Management und elektronischer Dateneingabe im Zentrum.

Reguläre Monitoringbesuche erfolgen entsprechend der Qualität des Prüfzentrums maximal drei Mal pro Jahr. Zum Studienende wird ein Abschlussbesuch durchgeführt.

Im Rahmen der regulären Monitoring-Besuche werden alle studienrelevanten Dokumente kontrolliert und ggf. aktualisiert. Der Umfang des Quelldatenvergleichs wird ebenfalls risikoabhängig festgelegt und im noch zu erstellenden Monitoring-Manual beschrieben. Zur Durchführung des Monitorings ermöglichen die Prüfer den Zutritt zu den Räumlichkeiten der Studiendurchführung, inkl. Lagerung der Prüfpräparate und Zugriff auf die Akten aller Studienteilnehmer zur Gewährleistung eines vollständigen Quelldatenvergleichs. Die exakte Planung und Durchführung des Monitorings basiert auf den dafür verfügbaren SOPs des KKS und wird in einem noch zu erstellenden Monitoringmanual genauer spezifiziert.

## 11.3 Audits

Um die GCP-Konformität der Studiendurchführung sicherzustellen, behält sich der Sponsor vor, in den Prüfzentren stichprobenartig Audits zu veranlassen, die von einem unabhängigen Auditor im Auftrag des Sponsors durchgeführt werden.

Der Prüfer ist verpflichtet, dem Auditor Zugang zu allen studienrelevanten Dokumenten, einschließlich der Akten der Studienteilnehmer zu gewähren.

## 11.4 Inspektionen

Nach AMG und GCP-V ist im Rahmen der Studienplanung und –durchführung, aber auch danach mit Inspektionen durch Vertreter der Bundesoberbehörde bzw. der Landesbehörden zu rechnen.

Der Prüfer ist verpflichtet, den Inspektoren Zugang zu allen studienrelevanten Dokumenten, einschließlich der Akten der Studienteilnehmer zu gewähren.

## 11.5 Unabhängige Überwachung der Studie

Ein unabhängiges Datenüberwachungskomitees (Data Monitoring Committee – DMC) wird in dieser Studie die Sicherheit der Studientherapie in regelmäßigen Abständen kontrollieren. Das DMC ist ein unabhängiges Gremium bestehend aus unterschiedlichen Experten, die bei Bedarf Zwischenanalysen von Sicherheitsdaten zur Verfügung gestellt bekommen.

Nach der “Guideline on Data Monitoring Committees” (CHMP/EWP/5872/0f3 Corr) überwacht das DMC die Sicherheitsinteressen der Teilnehmer im Rahmen einer klinischen Prüfung, indem die Sicherheit der Studientherapie beurteilt sowie die Integrität und die Validität der erhobenen Daten und die Durchführung einer klinischen Prüfung überwacht werden.

Das DMC hat darüber hinaus die Aufgabe, dem Sponsor Empfehlungen hinsichtlich der weiteren Durchführung (z.B. Abbruch oder Modifizierung) einer Studie anhand der Zwischenanalysen auf Basis der erhobenen Daten zu geben.

Die Einbindung des DMC in die klinische Prüfung erfolgt nach den verfügbaren SOPs des KKS.

## **12 DATENSCHUTZ UND SCHWEIGEPFLICHT**

Im Rahmen der Studie werden von den Studienteilnehmern personenbezogene Daten und Daten zur Behandlung und zum Krankheitsverlauf erhoben.

Diese Daten werden in pseudonymisierter Form (d.h. ohne direkten Bezug zum Patientennamen) mit Hilfe einer Identifikations-Nummer elektronisch gespeichert und ausgewertet.

Die Datenverarbeitung erfolgt im Zentrums für Klinische Studien Leipzig - KKS. Mit Hilfe eines Sicherheitskonzepts wird hier u.a. der Schutz vor unbefugtem Zugriff und der Schutz vor Datenverlust sichergestellt und dafür Sorge getragen, dass die Bestimmungen des Datenschutzgesetzes eingehalten werden. Die Studiendaten sind vor fremden Zugriff geschützt und nur Mitarbeiter der Studie dürfen auf diese zugreifen. Diese Mitarbeiter sind zur Verschwiegenheit verpflichtet.

Im Falle eines Widerrufs der Einwilligung durch den Patienten wird geprüft, inwieweit die gespeicherten Daten noch erforderlich sind. Nicht mehr benötigte Daten werden unverzüglich gelöscht. Die erhobenen personenbezogenen Daten werden nach Erreichen des Studienziels/nach Abschluss aller studienbegleitenden Projekte, spätestens jedoch nach 10 Jahren gelöscht/anonymisiert, soweit nicht gesetzliche, satzungsmäßige oder vertragliche Aufbewahrungsfristen entgegenstehen.

### **12.1 Erklärung zum Datenschutz**

Bei Dateneingabe, -verarbeitung und -auswertung, die im Zentrum für Klinische Studien Leipzig – KKS, Universität Leipzig, Härtelstr. 16-18, 04107 Leipzig erfolgt, werden die Bestimmungen des Datenschutzgesetzes eingehalten. Zugriff auf alle Studiendaten haben nur Mitarbeiter der Studie. Diese Personen sind zur Verschwiegenheit verpflichtet. Die Daten sind vor fremden Zugriff geschützt.

### **12.2 Erklärung zur pseudonymisierten Weitergabe personenbezogener Daten**

Der Sponsor bestätigt hiermit, dass die Weitergabe der personenbezogenen Daten in pseudonymisierter Form im Rahmen der Dokumentations- und Mitteilungspflichten nach §§12 und 13 der GCP-Verordnung an die dort genannten Empfänger erfolgt. Es wird weiterhin bestätigt, dass Personen, die der Weitergabe der Daten nicht zustimmen, nicht in die klinische Prüfung eingeschlossen werden.

## **13 ADMINISTRATIVE REGELUNGEN**

### **13.1 Studiendurchführung nach Prüfplan**

Die hier dargestellte klinische Prüfung wird entsprechend den Anforderungen von ICH-GCP und den geltenden gesetzlichen Bestimmungen (AMG/GCP-Verordnung) geplant, durchgeführt und ausgewertet.

Prüfplanverletzungen sind sämtliche Abweichungen von den Anweisungen und Abläufen, die in diesem Prüfplan beschrieben werden. Hierbei zählt lediglich die Verletzung der Ein- und Ausschlusskriterien als schwerwiegende Protokollverletzung.

Nachdem ein Studienteilnehmer in die Studie aufgenommen wurde, liegt es in der Verantwortung des Prüfers Prüfplanverletzungen zu vermeiden, um möglichst unverzerrte Informationen für die Studienaussage zu erhalten. Im Rahmen dieser Studie als schwerwiegend zu wertende Prüfplanverletzungen sind in Abschnitt 9.4.1 aufgelistet. Diese Liste kann im Verlauf der Studie ergänzt werden. Schwerwiegende Prüfplanverletzungen werden unverzüglich an die Studienleitung gemeldet.

Alle Prüfplanverletzungen werden dokumentiert und vor Schließung der Datenbank und Durchführung der statistischen Auswertung der Studie mit dem verantwortlichen Biometriker diskutiert.

Der Prüfer muss sicherstellen, dass alle erhobenen Daten entsprechend dem Prüfplan dokumentiert werden. Kleinere Abweichungen sind im Arbeitsalltag sicherlich nicht zu vermeiden, müssen allerdings mit einer Begründung dokumentiert werden.

### **13.2 Finanzierung und Versicherungen**

Die Studie wird gefördert vom IFB AdipositasErkrankungen (Bundesministerium für Bildung und Forschung (BMBF)).

Es wurde eine Patientenversicherung abgeschlossen. Der Versicherer ist die HDI-Gerlin Industrie Versicherung AG. Die Nummer des Versicherungsscheins lautet 28-138971-03302. Eine Kopie des Versicherungsscheins sowie die Allgemeinen Versicherungsbedingungen (AVB) werden im Zentralen Studienordner (Trial Master File, TMF) sowie im Prüfarztordner (Investigator Site File, ISF) abgelegt. Eine Kopie der AVB wird mit der Patienteninformation an die Patienten ausgehändigt. Die Höhe der Versicherungssumme beträgt 500.000,00 € pro Patient.

### **13.3 Lokale Überwachung**

Der Sponsor, seine vertraglich benannten Vertreter bzw. Auftragnehmer und alle Prüfarzte sind verpflichtet, entsprechend § 67 (1) AMG ihre Teilnahme an einer klinischen Prüfung bei der für sie zuständigen lokalen Überwachungsbehörde entsprechend den Vorgaben der GCP-Verordnung §12 vorzunehmen, bevor der erste Patient in die Studie aufgenommen wird.

Gemäß §67 (3) AMG sind der Sponsor, seine vertraglich benannten Vertreter bzw. Auftragnehmer und alle Prüfarzte auch dazu verpflichtet, nachträgliche Änderungen, vorzeitige Abbrüche von Studienarmen oder der gesamten Studie und den regulären Abschluss der klinischen Prüfung nach §§ 12, 13 GCP-V bei den zuständigen lokalen Überwachungsbehörden anzuzeigen.

### 13.4 Publikationsvereinbarungen und Registrierung

Es wird angestrebt, die Ergebnisse dieser klinischen Prüfung in einer renommierten international erscheinenden medizinischen Fachzeitschrift zu veröffentlichen. In diesem Zusammenhang ist die klinische Prüfung im deutschen Studienregister ([https://drks-neu.uniklinik-freiburg.de/drks\\_web/](https://drks-neu.uniklinik-freiburg.de/drks_web/)) registriert. Die Wahl der Autorenschaft richtet sich nach den Richtlinien des *New England Journal of Medicine* (<http://www.icmje.org/>). Dies bedeutet, dass jeder Autor einen solchen Beitrag an der klinischen Prüfung und der Veröffentlichung geleistet hat, dass er eine öffentliche Verantwortung für die Integrität der gesamten Arbeit übernehmen kann. Damit sollte die Wahl der Autorenschaft nach folgenden Richtlinien erfolgen:

1. Wesentlicher intellektueller an der Idee die Studie durchzuführen und an der Umsetzung dieser Idee während der Beantragung
2. Substantieller Beitrag zum Studiendesign, Datenerhebung bzw. –Auswertung und Dateninterpretation.
3. Wesentlicher intellektueller Beitrag bei der Manuskripterstellung bzw. beim Korrekturvorgang
4. Abschließende Beurteilung der zu veröffentlichenden Manuskriptversion.

Autoren sollten an allen Punkten wesentlich mitgewirkt haben.

Die Autoren sind verpflichtet, das IFB AdipositasErkrankungen in der Autorenzeile zu nennen. Bei der institutionellen Zuordnung ist die Formulierung „Universitätsmedizin Leipzig, IFB AdipositasErkrankungen“ zu verwenden.

In allen Publikationen ist im Acknowledgement das BMBF wie folgt auszuweisen:

„Die Studie wurde durch das Bundesministerium für Bildung und Forschung (BMBF), FKZ: 01EO1001, gefördert.“

Bei zitierbaren Abstracts ist analog auf den Förderer und den IFB Adipositas hinzuweisen. Auf Postern muss zudem das Logo des IFB AdipositasErkrankungen und des BMBF verwendet werden.

Die Prüfzentren haben Anrecht auf die wissenschaftliche Nutzung der Daten, die in dieser klinischen Prüfung generiert werden. Nach Rücksprache mit der Studienleitung können die Prüfzentren mit diesen Daten eigene wissenschaftliche Fragestellungen bearbeiten und unter eigenem Namen zur Veröffentlichung bringen.

## 14 UNTERSCHRIFTEN ZUM PRÜFPLAN

### Bestätigung des Prüfplans

Der Prüfplan wird hiermit in seiner endgültigen Fassung bestätigt:

Prof. Dr. H. Wrigge

Verantwortlicher Vertreter des  
Sponsors (gleichzeitig LKP)

\_\_\_\_\_

Datum

\_\_\_\_\_

Unterschrift

Dr. D. Petroff

Biometriker:

\_\_\_\_\_

Datum

\_\_\_\_\_

Unterschrift

## 15 ANERKENNUNG DES PRÜFPLANS

Hiermit bestätige ich, dass ich den vorliegenden Prüfplan gelesen und verstanden habe und in allen Teilen anerkenne. Ich verpflichte mich, dafür zu sorgen, dass die von meinem Zentrum in die Studie eingebrachten Patienten nach den Festlegungen dieses Prüfplans behandelt, beobachtet und dokumentiert werden. Ich verpflichte mich, dafür Sorge zu tragen, dass alle an der klinischen Prüfung beteiligten Personen über den Inhalt des Prüfplans informiert sind.

Datum:

\_\_\_\_\_

Unterschrift Prüfer:

\_\_\_\_\_

Adresse Prüfzentrum (Stempel):

\_\_\_\_\_  
\_\_\_\_\_  
\_\_\_\_\_  
\_\_\_\_\_

## 16 ANHANG

### 16.1 Klassifikation unerwünschter Ereignisse

#### 16.1.1 Schweregrad

Der Schweregrad eines unerwünschten Ereignisses wird entsprechend der Definitionen im Kapitel 7.4 und 7.6 beurteilt.

#### 16.1.2 Beurteilung der Intensität

Die Beurteilung der Intensität erfolgt entsprechend der CTCAE V4.0.

|                                |                                                                                                                                                                                                                                                                                                                        |
|--------------------------------|------------------------------------------------------------------------------------------------------------------------------------------------------------------------------------------------------------------------------------------------------------------------------------------------------------------------|
|                                | Leichtes Ereignis                                                                                                                                                                                                                                                                                                      |
| Mild Adverse Event             | <ul style="list-style-type: none"> <li>• Asymptomatische oder milde Symptome;</li> <li>• Nur klinische oder diagnostische Überwachung;</li> <li>• keine Intervention notwendig.</li> </ul>                                                                                                                             |
|                                | Moderates/mittelschweres Ereignis                                                                                                                                                                                                                                                                                      |
| Moderate Adverse Event         | <ul style="list-style-type: none"> <li>• Minimale, lokale oder nicht-invasive Intervention erforderlich;</li> <li>• Altersabhängige Teilnahme an Aktivitäten des täglichen Lebens*<sup>2</sup> eingeschränkt möglich</li> </ul>                                                                                        |
|                                | Schweres Ereignis                                                                                                                                                                                                                                                                                                      |
| Severe Adverse Event           | <ul style="list-style-type: none"> <li>• medizinische signifikant, aber nicht unmittelbar lebensbedrohlich;</li> <li>• Krankenhausaufenthalt oder Verlängerung eines Krankenhausaufenthaltes notwendig</li> <li>• Bleibende Schäden/Behinderungen</li> <li>• Selbstfürsorge* nur noch eingeschränkt möglich</li> </ul> |
|                                | Lebensbedrohliches Ereignis                                                                                                                                                                                                                                                                                            |
| Life-threatening Adverse Event | <ul style="list-style-type: none"> <li>• lebensbedrohliche Konsequenzen</li> <li>• Akutbehandlung notwendig</li> </ul>                                                                                                                                                                                                 |
| Death related to Adverse Event | Tod als Folge des AE                                                                                                                                                                                                                                                                                                   |

<sup>2</sup> Aktivitäten des täglichen Lebens:

\* Teilnahme an Aktivitäten des täglichen Lebens bezieht sich auf Zubereitung von Speisen, Einkauf von Lebensmitteln oder Kleidung, Nutzung des Telefons, Umgang mit Geld etc.

\*\* Selbstfürsorge bezieht sich auf Baden, Anziehen, Ausziehen, selber essen, Toilettennutzung, Medikamenteneinnahme, keine Bettlägerigkeit

### 16.1.3 Beurteilung des Kausalzusammenhanges

Der Prüfer muss beurteilen, ob seiner Meinung nach das Auftreten des unerwünschten Ereignisses in einem kausalen Zusammenhang mit der Gabe der Studienmedikation steht. Dabei ist die unten genannte Klassifikation anzuwenden.

- plausibler Zusammenhang
- kein plausibler Zusammenhang

Ein plausibler Zusammenhang liegt vor, wenn eines der folgenden Kriterien nach WHO-UMC erfüllt ist:

- Es besteht ein plausibler zeitlicher Zusammenhang mit der Gabe des Prüfpräparates, der nicht durch Begleiterkrankung oder andere Produkte erklärt werden kann. Die Reaktion auf das Absetzen des Prüfpräparates muss klinisch plausibel begründbar sein. Das Ereignis ist eine bestimmte pharmakologische oder phänomenologische Reaktion, die durch Wiedergabe des Produktes bestätigt werden kann, wenn dies notwendig ist.
- Es besteht ein begründeter zeitlicher Zusammenhang mit der Gabe des Prüfpräparates, der nicht durch Begleiterkrankung oder andere Produkte erklärt werden kann. Die Reaktion auf das Absetzen des Prüfpräparates ist klinisch sinnvoll begründbar. Eine Wiedergabe des Prüfpräparates zum Nachweis ist nicht notwendig.
- Es besteht ein begründeter zeitlicher Zusammenhang mit der Gabe des Prüfpräparates, der aber auch durch Begleiterkrankung oder andere Produkte erklärt werden kann. Informationen über Absetzen des Prüfpräparates sind mangelhaft oder unklar.
- Es sind weitere Informationen notwendig oder in Bearbeitung, die eine exakte Beurteilung ermöglichen.
- Eine Beurteilung ist nicht möglich, da die Informationen unzureichend oder widersprüchlich sind.

Kein plausibler Zusammenhang liegt vor, wenn das folgende Kriterium nach WHO-UMC erfüllt ist:

- Ein zeitlicher Zusammenhang mit der Gabe des Prüfpräparates liegt nicht vor, wodurch ein kausaler Zusammenhang unwahrscheinlich ist. Andere Produkte oder zugrunde liegende Erkrankungen liefern eine plausible Erklärung.

### 16.1.4 Erwartet / Unerwartet

Unerwartet sind unerwünschte Ereignisse dann, wenn sie nicht in der aufgetretenen Art oder in der aufgetretenen Intensität in der Fachinformation/Investigator's Brochure beschrieben sind (siehe Prüfarztordner).

### 16.1.5 Ausgang des unerwünschten Ereignisses

Der Ausgang eines unerwünschten Ereignisses wird wie folgt klassifiziert:

- wiederhergestellt
- Besserung
- nicht wiederhergestellt
- wiederhergestellt mit Folgeschäden
- tödlich \*

- unbekannt

\* Achtung: Der Tod eines Patienten ist an sich kein Ereignis, sondern dessen Ergebnis. Das Ereignis, welches zum Tod des Patienten geführt hat, muss vollständig dokumentiert und gemeldet werden, auch wenn der Tod erst vier Wochen nach Ende der Einnahme der Studienmedikation aufgetreten ist, und unabhängig davon, ob es einen Zusammenhang mit der Therapie gibt oder nicht.

## 16.2 Abkürzungen

|       |                                                                                                      |
|-------|------------------------------------------------------------------------------------------------------|
| AE    | unerwünschtes Ereignis (adverse event)                                                               |
| AM    | Arzneimittel                                                                                         |
| AMG   | Arzneimittelgesetz                                                                                   |
| AUC   | Aerea under the curve = Fläche unter der Konzentrations-Zeit-Kurve                                   |
| BfArM | Bundesinstitut für Arzneimittel und Medizinprodukte                                                  |
| BOB   | Bundesoberbehörde                                                                                    |
| CRF   | Case Report Form = Dokumentationsbogen                                                               |
| EK    | Ethikkommission                                                                                      |
| FAS   | Full Analysis Set                                                                                    |
| GCP   | Good Clinical Practice                                                                               |
| GCP-V | GCP-Verordnung                                                                                       |
| ICH   | International Conference on Harmonisation                                                            |
| ISF   | Investigator Site File (Prüfarztordner)                                                              |
| KKS   | Zentrum für Klinische Studien Leipzig – KKS                                                          |
| MIC   | minimal inhibitory concentration                                                                     |
| PD    | Pharmakodynamik                                                                                      |
| PK    | Pharmakokinetik                                                                                      |
| PPS   | Per Protocol Set                                                                                     |
| SAE   | schwerwiegendes unerwünschtes Ereignis (serious adverse event)                                       |
| SAR   | schwerwiegende Nebenwirkung (serious adverse reaction)                                               |
| SAS   | Safety Analysis Set                                                                                  |
| SUSAR | Unerwartete, schwerwiegende Arzneimittelnebenwirkung (suspected unexpected serious adverse reaction) |

## 16.3 Literatur

- [1] Barbour A, Schmidt S, Rout WR, Ben-David K, Burkhardt O, and Derendorf H. Soft tissue penetration of cefuroxime determined by clinical microdialysis in morbidly obese patients undergoing abdominal surgery. *Int J Antimicrob Agents* 2009;34:231-235
- [1b] Schwameis R, Zeitlinger M. Methods to measure target site penetration of antibiotics in critically ill patients. *Curr Clin Pharmacol*. 2013 Feb 1;8(1):46-58.
- [2] Centers for Disease Control and Prevention. National Health and Nutrition Examination Survey 2007-2008. <http://www.cdc.gov/nchs/nhanes.htm> 2009;
- [2b] Sauermann R, Delle-Karth G, Marsik C, Steiner I, Zeitlinger M, Mayer-Helm BX, Georgopoulos A, Müller M, Joukhadar C. Pharmacokinetics and pharmacodynamics of ceftiofur in subcutaneous adipose tissue of septic patients. *Antimicrob Agents Chemother*. 2005 Feb;49(2):650-5.
- [3] Declaration of Helsinki: Guiding Physicians in Biomedical Research Involving Human Subjects. Adopted by the 18th World Medical Assembly, Helsinki (Finland), June 1964. Last amendment by the 48th General Assembly, Somerset West (Rep. of South Africa) 1996
- [3b] Dehghanyar P, Bürger C, Zeitlinger M, Islinger F, Kovar F, Müller M, Kloft C, Joukhadar C. Penetration of linezolid into soft tissues of healthy volunteers after single and multiple doses. *Antimicrob Agents Chemother*. 2005 Jun;49(6):2367-71.
- [4] Dindo D, Muller MK, Weber M, and Clavien PA. Obesity in general elective surgery. *Lancet* 2003;361:2032-2035
- [4b] Müller M. Monitoring tissue drug levels by microdialysis. *Altern Lab Anim* 2009; 37:57–59
- [5] European Commission (2004.04): Detailed guidance on the collection, verification and presentation of adverse reaction reports arising from clinical trials on medicinal products for human use, revision 2
- [5b] Müller M. Science, medicine and the future: microdialysis. *BMJ* 2002 324:588–591
- [6] Gesetz über den Verkehr mit Arzneimitteln (Arzneimittelgesetz - AMG) zuletzt geändert durch die Verordnung vom 28. September 2009 (BGBl. I; S.3172).
- 6b) Brunner M, Müller M. Microdialysis in clinical drug delivery studies. In: Westerink BH, 198 Cremers TI (eds) *Handbook of microdialysis*. Elsevier 2007, pp 625–644
- [7] Hollenstein UM, Brunner M, Schmid R, and Muller M. Soft tissue concentrations of ciprofloxacin in obese and lean subjects following weight-adjusted dosing. *Int J Obes Relat Metab Disord* 2001;25:354-358
- [7b] Müller M (2000) Microdialysis in clinical drug delivery studies. *Adv Drug Deliv Rev* 2000; 45:255–269
- [8] Huschak G, Ruffert H, Wehner M, Taubert MH, Preiss R, Meinecke CD, Kaisers UX, and Regenthal R. Pharmacokinetics and clinical toxicity of prilocaine and ropivacaine following combined drug administration in brachial plexus anesthesia. *Int J Clin Pharmacol Ther* 2009;47:733-743
- [8b] Müller M, delaPena A, Derendorf H. Issues in PK-PD of antibiotics: tissue penetration. *Antimicrobial Agents Chemother* 2004 48:1441–1453
- [9] Huschak G, Wehner M, Röger B, Meinecke CD, and Kaisers UX. Maximale Plasmakonzentrationen von Prilocain und Ropivacain nach kombinierter Gabe zur Blockade des Nervus femoralis und ischiadicus. submitted 2011;
- [9b] Müller M. Monitoring tissue drug levels by microdialysis. *Altern Lab Anim* 2009; 37:57–59
- [10] International Conference on Harmonisation of Technical Requirements for the Registration of Pharmaceutical Products for Human Use: ICH Harmonized Tripartite Guideline, "Guideline for Good Clinical Practice". Recommended for Adoption at Step 4 of the ICH Process on 1 May 1996. [www.ichpma.org/ich5e.html#GCP](http://www.ichpma.org/ich5e.html#GCP)
- [10b] Whitaker G, Lunte CE. Investigation of microdialysis sampling calibration approaches for lipophilic analytes: doxorubicin. *J Pharm Biomed Anal* 2010 53:490–496

- [11] International Conference on Harmonisation of Technical Requirements for the Registration of Pharmaceutical Products for Human Use: ICH Harmonized Tripartite Guideline, "Clinical Data Safety Management: Definitions and Standards for Expedited Reporting". Recommended for Adoption at Step 4 of the ICH Process on 27 May 1994. [www.ich5e.html#Safety](http://www.ich5e.html#Safety)
- [11b] Burian B, Zeitlinger M, Donath O, Reznicek G, Sauermann R. Penetration of doripenem into skeletal muscle and subcutaneous adipose tissue in healthy volunteers. *Antimicrob Agents Chemother*. 2012; 56(1):532-5
- [12] Kirkland KB, Briggs JP, Trivette SL, Wilkinson WE, and Sexton DJ. The impact of surgical-site infections in the 1990s: attributable mortality, excess length of hospitalization, and extra costs. *Infect Control Hosp Epidemiol* 1999;20:725-730
- [12b] Brunner M, Langer O. Microdialysis versus other techniques for the clinical assessment of in vivo tissue drug distribution. *AAPS J* 2006; 8(2): E263–E271
- [13] National Nosocomial Infections Surveillance (NNIS) System Report, data summary from January 1992 through June 2004, issued October 2004. *Am J Infect Control* 2004;32:470-485
- [13b] Brunner M, Derendorf H. Clinical microdialysis: Current applications and potential use in drug development. *Trends Anal Chem* 2006; 25(7):674–680
- [14] Nguyen NT, Goldman C, Rosenquist CJ, Arango A, Cole CJ, Lee SJ, and Wolfe BM. Laparoscopic versus open gastric bypass: a randomized study of outcomes, quality of life, and costs. *Ann Surg* 2001;234:279-289
- [14b] Sahre M, Naik R, Derendorf H. Applications of microdialysis in skin and soft tissues. In: Tsai T-H (ed) *Applications of microdialysis in pharmaceutical sciences*. Wiley, London, 2011, p 584
- [15] Perencevich EN, Sands KE, Cosgrove SE, Guadagnoli E, Meara E, and Platt R. Health and economic impact of surgical site infections diagnosed after hospital discharge. *Emerg Infect Dis* 2003;9:196-203
- [15b] Joukhadar C, Klein N, Mayer BX, Kreischitz N, Delle-Karth G, Palkovits P, Heinz G, Muller M. Plasma and tissue pharmacokinetics of cefpirome in patients with sepsis. *Crit Care Med* 2002; 30(7):1478–1482
- [16] Schmidt S, Banks R, Kumar V, Rand KH, and Derendorf H. Clinical microdialysis in skin and soft tissues: an update. *J Clin Pharmacol* 2008;48:351-364
- [16b] Hollenstein U, Brunner M, Mayer BX, Delacher S, Erovic B, Eichler HG, Muller M. Target site concentrations after continuous infusion and bolus injection of cefpirome to healthy volunteers. *Clin Pharmacol Ther* 2000; 67(3):229–236
- [17] Tanaka S, Inoue S, Isoda F, Waseda M, Ishihara M, Yamakawa T, Sugiyama A, Takamura Y, and Okuda K. Impaired immunity in obesity: suppressed but reversible lymphocyte responsiveness. *Int J Obes Relat Metab Disord* 1993;17:631-636
- [17b] Burkhardt O, Brunner M, Schmidt S, Grant M, Tang Y, Derendorf H. Penetration of ertapenem into skeletal muscle and subcutaneous adipose tissue in healthy volunteers measured by in vivo microdialysis. *J Antimicrob Chemother* 2006; 58(3):632–636
- [18] Verordnung über die Anwendung der Guten Klinischen Praxis bei der Durchführung von klinischen Prüfungen mit Arzneimitteln zur Anwendung am Menschen (GCPVerordnung - GCP-V) vom 15. März 2006 (BGBl. I 3394).
- [19] Perioperative Antibiotikaphylaxe, Leitlinie; AK „Krankenhaus- und Praxishygiene“ der AWMF, 2012, elektronische Publikation: AWMF online
- [19b] Wiskirchen DE, Shepard A, Kuti JL, Nicolau DP. Determination of tissue penetration and pharmacokinetics of linezolid in patients with diabetic foot infections using in vivo microdialysis. *Antimicrob Agents Chemother* 2011; 55(9):4170–4175
- [20] KISS Krankenhaus-Infektions-Surveillance-System Nationales Referenzzentrum für Surveillance von nosokomialen Infektionen – Referenzdaten des OP-KISS 2011
- [20b] Traunmüller F, Schintler MV, Spendel S, Popovic M, Mauric O, Scharnagl E, Joukhadar C. Linezolid concentrations in infected soft tissue and bone following repetitive doses in diabetic patients with bacterial foot infections. *Int J Antimicrob Agents* 2010; 36(1):84–86

- 
- [21] Ted D. Adams, Ph.D., M.P.H., Richard E. Gress, M.A., Sherman C. Smith, M.D., R. Chad Halverson, M.D., Steven C. Simper, M.D., Wayne D. Rosamond, Ph.D., Michael J. LaMonte, Ph.D., M.P.H., Antoinette M. Stroup, Ph.D., and Steven C. Hunt, Ph.D. N Engl J Med 2007; 357:753-761
- [21b] Bulik CC, Wiskirchen DE, Shepard A, Sutherland CA, Kuti JL, Nicolau DP. Tissue penetration and pharmacokinetics of tigecycline in diabetic patients with chronic wound infections described by using in vivo microdialysis. Antimicrob Agents Chemother 2010; 54(12):5209–5213
- [22] Robert Koch-Institut (Hrsg) (2003) Übergewicht und Adipositas. Gesundheitsberichterstattung des Bundes. Heft 16. RKI, Berlin
- [23] Statistisches Bundesamt (StBA) (2010) Mikrozensus 2009, Fragen zur Gesundheit
- [24] Toma O, Suntrup P, Stefanescu A, London A, Mutch M, Kharasch E. Pharmacokinetics and tissue penetration of cefoxitin in obesity: implications for risk of surgical site infection. Anesth Analg. 2011 Oct;113(4):730-7. Epub 2011 Jun 3.
- [25] Muller M, Schmid R, Georgopoulos A, Buxbaum A, Wasicek C, Eichler HG (1995) Application of microdialysis to clinical pharmacokinetics in humans. Clin Pharmacol Ther 57(4):371–380
- [26] Cai Y, o, Liang B, Bai N, Liu Y. Systematic review and meta-analysis of the effectiveness and safety of tigecycline for treatment of infectious disease. Antimicrob Agents Chemother. 2011 Mar;55(3):1162-72. Epub 2010 Dec 20.
- [27] Bodmann KF, Grabein B, Adam D et al. Empfehlungen zur kalkulierten parenteralen Initialtherapie bakterieller Erkrankungen bei Erwachsenen. Chemother J 2010; 19:179-255
