# Supplementary material for: Measurement of soft tissue drug concentrations in morbidly obese and non-obese patients – A prospective, parallel group, open-labeled, controlled, phase IV, single center clinical trial
Source: PubMed Central journal article supplement — Contemp Clin Trials Commun. 2019 May 10;15:100375. doi: 10.1016/j.conctc.2019.100375 (PMC6535681; doi:10.1016/j.conctc.2019.100375), 2019-05-10
Supplement: mmc4.pdf [file mmc4.pdf]

## Ethik-Kommission an der Medizinischen Fakultät der Universität Leipzig

☎ Geschäftsstelle der Ethik-Kommission an der Medizinischen Fakultät der Universität Leipzig,  
Haus: Karl-Sudhoff-Institut für Geschichte der Medizin und der Naturwissenschaften,  
Käthe-Kollwitz-Str. 82, 04109 Leipzig

Vorsitzender: Professor Dr. R. Preiß

Universität Leipzig  
Medizinische Fakultät  
IFB AdipositasErkrankungen  
„IFB Data Center“  
c/o ZKS Leipzig – KKS  
Frau Dr. Christiane Prettin  
Härtelstraße 16-18  
04107 Leipzig

Leipzig, den 12. Juli 2013 pr/de  
**Bearb.: Nr. 121-13-28012013**  
**(Bitte stets angeben!)**

cc: BfArM

|                                |                                                                                                                                                                                              |
|--------------------------------|----------------------------------------------------------------------------------------------------------------------------------------------------------------------------------------------|
| <b>EudraCT-Nr.:</b>            | 2012-004383-22                                                                                                                                                                               |
| <b>Kurzwort/Studiencode:</b>   | Mikrodialyse                                                                                                                                                                                 |
| <b>Titel:</b>                  | Perioperative Komplikationen bei adipösen und nicht adipösen Patienten: Vorbeugung und Behandlung von Wundinfektionen und postoperativen Schmerzen. (Prüfplan final 3.0, vom 27.03.2013)     |
| <b>Principal investigator:</b> | Prof. Dr. Hermann Wrigge, Universitätsklinikum Leipzig AöR, Department für Operative Medizin, Klinik und Poliklinik für Anästhesiologie und Intensivtherapie, Liebigstraße 20, 04103 Leipzig |
| <b>Sponsor:</b>                | Universität Leipzig, Ritterstraße 26, 04109 Leipzig                                                                                                                                          |
| <b>Einreicher:</b>             | Zentrum für Klinische Studien Leipzig – KKS, Härtelstraße 16-18, 04107 Leipzig                                                                                                               |

Die Ethik-Kommission an der Medizinischen Fakultät der Universität Leipzig hat die Federführung für die o. g. monozentrische Studie und hat abschließend über diese Studie beraten.

Die Kommission verweist darauf, dass die ethische und wissenschaftliche Verantwortung für die Durchführung der Untersuchungen beim Leiter der Studie verbleibt. Es bestehen keine grundsätzlichen ethischen oder berufsrechtlichen Einwände, sofern nachfolgend aufgeführte Forderung/en eine Umsetzung erfährt/erfahren:

- ❖ Die Nachreichung des CE-Zertifikates für die Mikrodialyse-Einrichtung (das vorgelegte Schreiben des schwedischen Herstellers ist nur eine Konformitätserklärung).

Der Bewertung lagen die in ad 1) aufgeführten Unterlagen zugrunde.

Die Bewertung ist für die in ad 2) aufgeführten Prüferinnen/Prüfer und Prüfstellen gültig.

An der Abstimmung haben die in ad 3) aufgeführten Kommissionsmitglieder teilgenommen.

Es wird bestätigt, dass Prüfarzte, die an der o. g. Studie beteiligt sind, nicht an der Abstimmung teilgenommen haben.

**Allgemeine Hinweise:**

- Die ethische und rechtliche Verantwortung für die Durchführung dieser klinischen Prüfung verbleibt beim Sponsor, bei der Leiterin/dem Leiter der klinischen Prüfung und bei den Prüferinnen/Prüfern.
- Zusammensetzung und Arbeitsweise der Ethik-Kommission entsprechen nationalen Gesetzen, Vorschriften und der ICH-GCP-Leitlinie in der jeweils gültigen Fassung.
- Gegen die vorliegende Stellungnahme kann innerhalb von einem Monat nach Bekanntmachung Widerspruch erhoben werden. Der Widerspruch ist schriftlich oder zur Niederschrift bei der federführenden Kommission einzureichen.

Mit freundlichen Grüßen

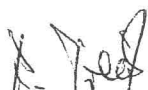

Professor Dr. R. Preiß  
Vorsitzender der Ethik-Kommission

**ad 1)**

|    |                                                                                                                                      |
|----|--------------------------------------------------------------------------------------------------------------------------------------|
| 1. | Prüfplan, Version final 3.0 vom 27.03.2013                                                                                           |
| 2. | Patienteninformation und –Einwilligung: Präparategruppe 1: Linezolid, Meropenem und Paracetamol/Metamizol (final 2.0, 13.03.2013)    |
| 3. | Patienteninformation und –Einwilligung: Präparategruppe 2: Tigecyclin und Paracetamol/Metamizol (final 2.0, 13.03.2013)              |
| 4. | Patienteninformation und –Einwilligung: Präparategruppe 3: Cefazolin, Metronidazol und Paracetamol/Metamizol (final 2.0, 13.03.2013) |
| 5. | Clinical Trial Application Form, geändert (vom 15.04.2013)                                                                           |
| 6. | CE-Zertifikat Mikrodialyse (Katheter und Pumpe)                                                                                      |
| 7. | CD-ROM                                                                                                                               |

**ad 2) – Zustimmend bewertete Prüferinnen/Prüfer und Prüfstellen:**

LKP: Professor Dr. Hermann Wrigge, **Stellvertreter:** Dr. med. Philipp Simon,  
**Prüfstelle:** Universitätsklinikum Leipzig AöR, Department für Operative Medizin, Klinik und Poliklinik für Anästhesiologie und Intensivtherapie, Liebigstraße 20, 04103 Leipzig

**ad 3)**

An der abschließenden Beratung und Beschlussfassung haben nachfolgend aufgeführte Mitglieder der hiesigen Ethik-Kommission teilgenommen:

**Vorsitzender:**

Prof. em. Dr. R. Preiß - Institut für Klinische Pharmakologie, Medizinische Fakultät, Universität Leipzig

**Mitglieder:**

Prof. Dr. Jan Dreßler - Institut für Rechtsmedizin, Medizinische Fakultät, Universität Leipzig,

Prof. Dr. Dr. Bernhard Frerich - Klinik und Poliklinik für Mund-, Kiefer- und Plastische Gesichtschirurgie im hause der Chirurgischen Universitätsklinik Rostock

Prof. em. Dr. Derk Olthoff - Department für Operative Medizin, Klinik und Poliklinik für Anästhesiologie und Intensivtherapie, Universitätsklinikum Leipzig AöR

Prof. Dr. Martin Petzoldt - Institut für Systematische Theologie, Theologische Fakultät, Universität Leipzig

Prof. Dr. Dr. Ortrun Riha - Karl-Sudhoff-Institut für Geschichte der Medizin und der Naturwissenschaften, Medizinische Fakultät, Universität Leipzig

Prof. Dr. Michael Schaefer - Rudolf-Boehm-Institut für Pharmakologie und Toxikologie, Medizinische Fakultät, Universität Leipzig

Prof. em. Dr. Peter Schneider - Klinik für Kinderkardiologie, Universität Leipzig - Herzzentrum Leipzig GmbH

Prof. h. c. Arnd Schultheiß - Maler und Graphiker/Kultursenator; Leipzig

Weigel, Nicole - Justizariat, Universität Leipzig

- Neuerstellung des Briefes aufgrund redaktioneller Überarbeitung -

## Ethik-Kommission an der Medizinischen Fakultät der Universität Leipzig

☐ Geschäftsstelle der Ethik-Kommission an der Medizinischen Fakultät der Universität Leipzig,  
Haus: Karl-Sudhoff-Institut für Geschichte der Medizin und der Naturwissenschaften,  
Kälbe-Kollwitz-Str. 82, 04109 Leipzig

Vorsitzender: Professor Dr. R. Preiß

Universität Leipzig  
Medizinische Fakultät  
IFB AdipositasErkrankungen  
„IFB Data Center“  
c/o ZKS Leipzig – KKS  
Frau Dr. Christiane Prettin  
Härtelstraße 16-18  
04107 Leipzig

Leipzig, den 8. Juli 2013 pr/de

Bearb.: Nr. **121/13-ff**

(Bitte stets angeben!)

cc: BfArM

|                                |                                                                                                                                                                                              |
|--------------------------------|----------------------------------------------------------------------------------------------------------------------------------------------------------------------------------------------|
| <b>EudraCT-Nr.:</b>            | <b>2012-004383-22</b>                                                                                                                                                                        |
| <b>Kurzwort/Studiencode:</b>   | <b>Mikrodialyse</b>                                                                                                                                                                          |
| <b>Titel:</b>                  | Perioperative Komplikationen bei adipösen und nicht adipösen Patienten: Vorbeugung und Behandlung von Wundinfektionen und postoperativen Schmerzen.                                          |
| <b>Principal investigator:</b> | Prof. Dr. Hermann Wrigge, Universitätsklinikum Leipzig AöR, Department für Operative Medizin, Klinik und Poliklinik für Anästhesiologie und Intensivtherapie, Liebigstraße 20, 04103 Leipzig |
| <b>Sponsor:</b>                | Universität Leipzig, Ritterstraße 26, 04109 Leipzig                                                                                                                                          |
| <b>Einreicher:</b>             | Zentrum für Klinische Studien Leipzig – KKS, Härtelstraße 16-18, 04107 Leipzig                                                                                                               |

Die Ethik-Kommission an der Medizinischen Fakultät der Universität Leipzig hat die im Schreiben vom 17.06.2013 eingereichten Unterlagen zur Kenntnis genommen und erhebt keine Einwände gegen diese.

Der Kommission lagen folgende Unterlagen vor:

- CE-Zertifikat Mikrodialyse

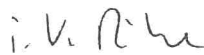

Professor Dr. R. Preiß  
Vorsitzender der Ethik-Kommission
